# Supplementary material
Source: ML conference proceedings conference paper supplement (https://openreview.net/forum?id=DCIsNIUCV7)
Supplement: supplementary_material [file attachment]

---

# Payoff-based Learning with Matrix Multiplicative Weights in Quantum Games

---

Anonymous Author(s)

Affiliation

Address

email

## Abstract

In this paper, we study the problem of learning in quantum games with scalar, payoff-based feedback. For concreteness, we focus on the widely used *matrix multiplicative weights* (MMW) algorithm and, instead of requiring players to have full knowledge of the game (and/or each other's chosen states), we introduce a suite of *minimal-information matrix multiplicative weights* (3MW) methods tailored to different information frameworks. The main difficulty to attaining convergence in this setting is that, in contrast to classical finite games, quantum games have an infinite continuum of pure states (the quantum equivalent of pure strategies), so standard importance-weighting techniques for estimating payoff vectors cannot be employed. Instead, we borrow ideas from bandit convex optimization and we design a zeroth-order gradient sampler adapted to the semidefinite geometry of the problem at hand. As a first result, we show that the 3MW method with deterministic payoff feedback retains the  $\mathcal{O}(1/\sqrt{T})$  convergence rate of the vanilla, full information MMW algorithm in quantum min-max games, even though the players only observe a single scalar. Subsequently, we relax the algorithm's information requirements even further and we provide a 3MW method that only requires players to observe a random realization of their payoff observable, and converges to equilibrium at an  $\mathcal{O}(T^{-1/4})$  rate. Finally, going beyond zero-sum games, we show that a regularized variant of the proposed 3MW method guarantees local convergence with high probability to all equilibria that satisfy a certain first-order stability condition.

## 1 Introduction

The integration of quantum information theory into computer science and machine learning [4, 39, 49] has the potential to disrupt the field by providing faster and more efficient computing resources, new encryption and security protocols, and improved machine learning algorithms, enabling advancements in areas such as quantum cryptography, shadow tomography, QGANs, and adversarial learning [1, 11, 14, 31]. As a well-known example, Google's "Sycamore" 54-qubit processor recently showcased this "quantum advantage" by training an autonomous vehicle model in less than 200 seconds [4], a fact made possible by the ability of quantum computers to prepare superpositions of qubits that exceed the operational capabilities of standard Boolean gates. [By contrast, classical computers are limited by their binary alphabet and memory structure in this regard.]

Deploying such models within a multi-agent context, such as the utilization of QGANs or autonomous vehicles, leads to a significant transformation compared to classical non-cooperative environments. This shift primarily arises due to the inherent properties of quantum systems, namely the decoherence and entanglement principle. Specifically, these quantum notions enable quantum players to possess an edge over "classical" ones, attaining greater payoffs than would be achievable [16, 36]. This phenomenon occurs due to the disparity in probabilistic mixing between the quantum and classical

domains. Unlike classical games, where a mixed strategy is a probabilistic mixture of the underlying pure strategies, quantum games utilize mixed states, which represent probabilistic mixtures of quantum projectors. As a consequence, a mixed quantum state can yield payoffs that cannot be expressed as a convex combination of classical pure strategies.

In light of this, quantum learning has drawn significant attention in recent years [2, 21, 22, 27, 28, 46]. In a multi-agent context, the most widely used framework is the so-called *matrix multiplicative weights* (MMW) algorithm [2, 12, 21, 22, 29]: First introduced by Tsuda et al. [45] in the context of matrix and dictionary learning, MMW can be viewed as a semidefinite analogue of the standard Hedge / EXP3 methods for multi-armed bandits [6, 30, 47], and is a special case of the mirror descent family of algorithms [37]. Specifically, in the concrete setting of two-player, zero-sum quantum games, Jain & Watrous [21] showed that players using the MMW algorithm can learn an  $\varepsilon$ -equilibrium in  $\mathcal{O}(1/\varepsilon^2)$  iterations – or, in terms of speed of convergence after  $T$  iterations, they converge to equilibrium at a  $\mathcal{O}(1/\sqrt{T})$  rate.

To the best of our knowledge, this result remains the tightest known bound for Nash equilibrium learning in quantum games. Following the work of [21], Jain et al. [22] studied its continuous-time analogue – the *quantum replicator dynamics* (QRD) – in quantum min-max games, focusing on the recurrence and volume conservation properties of the players’ actual trajectory of play. Going beyond quantum min-max games, [32] examined the convergence of learning under the dynamics of “*follow the quantum leader*” (FTQL), a class of continuous-time dynamics that includes the continuous-time analogue of MMW as a special case. Their main result was that the only states that are asymptotically stable under the (continuous-time) dynamics of FTQL are those that satisfy a certain first-order stationarity condition known as *variational stability*. In a similar line of work, Lin et al. [29] studied the continuous-time QRD, and discrete-time MMW dynamics in quantum potential games, utilizing a Riemannian metric to obtain a gradient flow.

**Our contributions in the context of previous work.** Importantly, all works mentioned above, in both continuous and discrete time, assume full information, i.e., players have access to their individual gradients – which, among others, might imply that they have full knowledge of the game. However, this condition is rarely met in online learning environments where players only observe their in-game payoffs; this is precisely the starting point of our paper which aims to derive a convergent payoff-based, gradient-free variant of MMW algorithm for learning in quantum games.

A major roadblock in this is that standard approaches from learning in finite games fail in the quantum setup for two reasons: First and foremost, there is a *continuum* of pure states available to every player, unlike classical finite games where there is only a *finite* set of pure actions. Second, even after the realization of the pure states of the players, there is an inherent uncertainty and randomness due to the payoff-generating quantum process (an aspect that has no classical counterpart). To overcome this hurdle, we employ a continuous-action reformulation of quantum games, and we leverage techniques from bandit convex optimization for estimating the players’ payoff gradients.

Our first contribution is a variant of MMW that only requires mixed payoff observations and achieves an  $\mathcal{O}(1/\sqrt{T})$  equilibrium convergence rate in two-player zero-sum quantum games, matching the rate of the full information MMW in [21]. Then, to account for information-starved environments where players are only able to observe their in-game, realized payoff observable, we also develop a bandit variant of MMW which utilizes a single-point gradient estimation technique in the spirit of [43] and achieves an  $\mathcal{O}(T^{-1/4})$  equilibrium convergence rate. Finally, we also examine the behavior of the MMW algorithm with bandit information in general  $N$ -player games, where we show that variationally stable equilibria are locally attracting with high probability.

As far as we are aware, there are no comparable convergence results in the literature, a fact we believe opens an intriguing research agenda for equilibrium learning in quantum games.

## 2 Problem setup and preliminaries

We begin by reviewing some basic notions from the theory of quantum games, mainly intended to set notation and terminology; for a comprehensive introduction, see [19]. To streamline our presentation, we introduce the various primitives of quantum games in a 2-player setting; the extension to the general case is straightforward, but the notation heavier, so we postpone this until needed.

**Notation.** Given a (complex) Hilbert space  $\mathcal{H}$ , we will use Dirac’s bra-ket notation and write  $|\psi\rangle$  for an element of  $\mathcal{H}$  and  $\langle\psi|$  for its adjoint; otherwise, when a specific basis is implied by the context, we will use the dagger notation “ $\dagger$ ” to denote the Hermitian transpose  $\psi^\dagger$  of  $\psi$ . We will also write  $\mathbb{H}^d$  for the space of  $d \times d$  Hermitian matrices, and  $\mathbb{H}_+^d$  for the cone of positive-semidefinite matrices in  $\mathbb{H}^d$ . Finally, we denote by  $\|\mathbf{A}\|_F = \sqrt{\text{tr}[\mathbf{A}^\dagger \mathbf{A}]}$  the Frobenius norm of  $\mathbf{A}$  in  $\mathbb{H}^d$ .

**Quantum games.** Following [16, 19], a 2-player *quantum game* consists of the following:

1. Each player  $i \in \mathcal{N} := \{1, 2\}$  has access to a complex Hilbert space  $\mathcal{H}_i \cong \mathbb{C}^{d_i}$  describing the set of (pure) *quantum states* available to the player (typically a discrete register of qubits). A quantum state is an element  $\psi_i$  of  $\mathcal{H}_i$  with unit norm, so the set of pure states is the unit sphere  $\Psi_i := \{\psi_i \in \mathcal{H}_i : \|\psi_i\|_F = 1\}$  of  $\mathcal{H}_i$ . We will write  $\Psi := \Psi_1 \times \Psi_2$  for the space of all ensembles  $\psi = (\psi_1, \psi_2)$  of pure states  $\psi_i \in \Psi_i$  that are independently prepared by each player.
2. The rewards that players receive are based on their individual *payoff functions*  $u_i : \Psi \rightarrow \mathbb{R}$ , and they are derived through a *positive operator-valued measure* (POVM) quantum measurement process. Following [13], this unfolds as follows: Given a *finite* set of *measurement outcomes*  $\Omega$  that a referee can observe from the players’ quantum states (e.g., measure a player-prepared qubit to be “up” or “down”), each outcome  $\omega \in \Omega$  is associated to a positive semi-definite operator  $\mathbf{P}_\omega : \mathcal{H} \rightarrow \mathcal{H}$  defined on the tensor product  $\mathcal{H} := \mathcal{H}_1 \otimes \mathcal{H}_2$  of the players’ individual state spaces. We further assume that  $\sum_{\omega \in \Omega} \mathbf{P}_\omega = \mathbf{I}$  so the probability of observing  $\omega \in \Omega$  at state  $\psi \in \Psi$  is  $P_\omega(\psi) = \langle \psi_1 \otimes \psi_2 | \mathbf{P}_\omega | \psi_1 \otimes \psi_2 \rangle$ .

The payoff of each player is then generated by this measurement process via a *payoff observable*  $U_i : \Omega \rightarrow \mathbb{R}$ : specifically, the measurement  $\omega$  is drawn from  $\Omega$  based on the players’ state profile  $\psi = (\psi_1, \psi_2)$ , and each player  $i \in \mathcal{N}$  receives as reward the quantity  $U_i(\omega)$ . Accordingly, the player’s expected payoff at state  $\psi \in \Psi$  will be  $u_i(\psi) := \langle U_i \rangle \equiv \sum_{\omega} P_\omega(\psi) U_i(\omega)$ .

A *quantum game* is then defined as a tuple  $\mathcal{Q} \equiv \mathcal{Q}(\mathcal{N}, \Psi, u)$  with players, states, and payoff as above.

**Mixed states.** Apart from pure states, each player  $i \in \mathcal{N}$  may prepare probabilistic mixtures thereof, known as *mixed states*. These mixed states differ from mixed strategies used in classical, finite games as they do not correspond to convex combinations of their pure counterparts; instead, given a family of pure quantum states  $\psi_{i\alpha_i} \in \Psi_i$  indexed by  $\alpha_i \in \mathcal{A}_i$ , a mixed state is described by a *density matrix* of the form

$$\mathbf{X}_i = \sum_{\alpha_i \in \mathcal{A}_i} x_{i\alpha_i} |\psi_{i\alpha_i}\rangle \langle \psi_{i\alpha_i}| \quad (1)$$

where the *mixing weights*  $x_{i\alpha_i} \geq 0$  of each  $\psi_{i\alpha_i}$  are normalized so that  $\text{tr} \mathbf{X}_i = 1$ . By Born’s rule, this means that if each player  $i \in \mathcal{N}$  prepares a density matrix  $\mathbf{X}_i$  as per (1), the probability of observing  $\omega \in \Omega$  under  $\mathbf{X} = (\mathbf{X}_1, \mathbf{X}_2)$  will be

$$P_\omega(\mathbf{X}) = \sum_{\alpha_1 \in \mathcal{A}_1} \sum_{\alpha_2 \in \mathcal{A}_2} x_{1,\alpha_1} x_{2,\alpha_2} P_\omega(\psi_\alpha). \quad (2)$$

where  $\psi_\alpha = \psi_{1,\alpha_1} \otimes \psi_{2,\alpha_2}$ . Therefore, in a slight abuse of notation, the expected payoff of player  $i \in \mathcal{N}$  under  $\mathbf{X}$  will be  $u_i(\mathbf{X}) = \sum_{\alpha \in \mathcal{A}} x_\alpha u_i(\psi_\alpha)$ , which, equivalently, can be written as:

$$u_i(\mathbf{X}) = \sum_{\omega \in \Omega} U_i(\omega) \text{tr}[\mathbf{P}_\omega \mathbf{X}_1 \otimes \mathbf{X}_2] = \text{tr}[\mathbf{W}_i \mathbf{X}_1 \otimes \mathbf{X}_2] \quad (3)$$

where the tensor  $\mathbf{W}_i = \sum_{\omega \in \Omega} U_i(\omega) \mathbf{P}_\omega \in \mathcal{H}$  incorporates all the payoff information of the game and is the quantum equivalent of the “payoff matrix” of player  $i \in \mathcal{N}$ . In light of this, (3) gives a clearer and more succinct representation of the payoff structure of  $\mathcal{Q}$  – see also Eq. (5) below.

**Contrasting to other classes of games.** The expression for a player’s expected payoff under a mixed state appears similar to mixed extensions of classical finite games, but this similarity is only skin-deep. The key conceptual differences with classical, finite games are as follows:

1. There is an infinite continuum of pure states  $\psi \in \Psi$ ; by contrast, in finite normal form games, there is always a finite number of strategies.
2. The decomposition (1) of a density matrix into pure states is not exclusive; there can be different sets of pure states and corresponding mixing weights that produce the same density matrix.
3. The superposition  $\lambda\psi + (1 - \lambda)\psi'$  of two pure states  $\psi$  and  $\psi'$  may lead to quantum interference terms of the form  $|\psi\rangle\langle\psi'|$  and  $|\psi'\rangle\langle\psi|$  in the induced payoff; this has no analogue in finite games.

**Continuous game reformulation.** In view of the above, treating a quantum game as a “tensorial” extension of a finite game can be misleading. For our purposes, it would be more suitable to treat a quantum game as a *continuous game* where each player  $i \in \mathcal{N}$  controls a matrix variable  $\mathbf{X}_i$  drawn from the “spectraplex” defined as  $\mathcal{X}_i = \{\mathbf{X}_i \in \mathbf{H}_+^{d_i} : \text{tr } \mathbf{X}_i = 1\}$ . In this interpretation, the players’ payoff functions  $u_i : \mathcal{X} \equiv \mathcal{X}_1 \times \mathcal{X}_2 \rightarrow \mathbb{R}$  are *linear* in each player’s density matrix  $\mathbf{X}_i \in \mathcal{X}_i$ ,  $i \in \mathcal{N}$ . Since  $u_1, u_2$  are linear in  $\mathbf{X}_1$  and  $\mathbf{X}_2$ , the individual payoff gradients of each player will be given by

$$\mathbf{V}_1(\mathbf{X}) := \nabla_{\mathbf{X}_1^\top} u_1(\mathbf{X}) = \mathbf{W}_1(\mathbf{I} \otimes \mathbf{X}_2) \quad \text{and} \quad \mathbf{V}_2(\mathbf{X}) := \nabla_{\mathbf{X}_2^\top} u_2(\mathbf{X}) = \mathbf{W}_2(\mathbf{X}_1 \otimes \mathbf{I}) \quad (4)$$

so we can further write each player’s payoff function as

$$u_1(\mathbf{X}) = \text{tr}[\mathbf{X}_1 \mathbf{V}_1(\mathbf{X})] \quad \text{and} \quad u_2(\mathbf{X}) = \text{tr}[\mathbf{X}_2 \mathbf{V}_2(\mathbf{X})] \quad \text{for all } \mathbf{X} \in \mathcal{X}. \quad (5)$$

Since  $\mathcal{X}$  is compact and each  $u_i$  is multilinear in  $\mathbf{X}$ , the players’ payoff functions are automatically bounded, Lipschitz continuous and Lipschitz smooth, i.e., there exist constants  $B_i$ ,  $G_i$  and  $L_i$ ,  $i \in \mathcal{N}$ , such that, for all  $\mathbf{X}, \mathbf{X}' \in \mathcal{X}$ , we have:

1. Boundedness:  $|u_i(\mathbf{X})| \leq B_i$
2. Lipschitz continuity:  $|u_i(\mathbf{X}) - u_i(\mathbf{X}')| \leq G_i \|\mathbf{X} - \mathbf{X}'\|_F$
3. Lipschitz smoothness:  $\|\mathbf{V}_i(\mathbf{X}) - \mathbf{V}_i(\mathbf{X}')\|_F \leq L_i \|\mathbf{X} - \mathbf{X}'\|_F$

**Nash equilibrium.** The most widely used solution concept in game theory is that of a *Nash equilibrium* (NE). In our context, it is mixed profile  $\mathbf{X}^* \in \mathcal{X}$  from which no player has incentive to deviate, i.e.,  $u_1(\mathbf{X}^*) \geq u_1(\mathbf{X}_1; \mathbf{X}_2^*)$  and  $u_2(\mathbf{X}^*) \geq u_2(\mathbf{X}_1^*; \mathbf{X}_2)$  for all  $\mathbf{X}_1 \in \mathcal{X}_1, \mathbf{X}_2 \in \mathcal{X}_2$ . Since  $\mathcal{X}_i$  is convex and  $u_i$  linear in  $\mathbf{X}_i$ , the existence of Nash equilibria follows from the Debreu’s theorem [15].

**Zero-sum quantum games.** In the case where  $u_1 = -u_2$ , and setting  $\mathcal{L} : \mathcal{X}_1 \times \mathcal{X}_2 \rightarrow \mathbb{R}$ , the Nash equilibria points of  $\mathcal{Q}$  are the saddle points of  $\mathcal{L}$ , i.e., the solutions of the minimax equality

$$\mathcal{L}^* := \max_{\mathbf{X}_1 \in \mathcal{X}_1} \min_{\mathbf{X}_2 \in \mathcal{X}_2} \mathcal{L}(\mathbf{X}_1, \mathbf{X}_2) = \min_{\mathbf{X}_2 \in \mathcal{X}_2} \max_{\mathbf{X}_1 \in \mathcal{X}_1} \mathcal{L}(\mathbf{X}_1, \mathbf{X}_2) \quad (6)$$

where the quantity  $\mathcal{L}^*$  is often called the value of the game. The set of Nash equilibria is nonempty due to Sion’s minimax theorem [42] for the bilinear function  $\mathcal{L}$ . Finally, for  $(\mathbf{X}_1^*, \mathbf{X}_2^*)$  a NE-point, we readily get that  $\mathcal{L}(\mathbf{X}_1^*, \mathbf{X}_2^*) = \max_{\mathbf{X}_1 \in \mathcal{X}_1} \mathcal{L}(\mathbf{X}_1, \mathbf{X}_2^*) = \min_{\mathbf{X}_2 \in \mathcal{X}_2} \mathcal{L}(\mathbf{X}_1^*, \mathbf{X}_2)$ , and we define the duality gap of  $\mathbf{X} = (\mathbf{X}_1, \mathbf{X}_2)$  with respect to  $\mathcal{L}$  as the quantity:

$$\text{Gap}_{\mathcal{L}}(\mathbf{X}) := \mathcal{L}(\mathbf{X}_1^*, \mathbf{X}_2) - \mathcal{L}(\mathbf{X}_1, \mathbf{X}_2^*) \quad (7)$$

In particular,  $\mathbf{X}^*$  is an  $\varepsilon$ -Nash equilibrium of  $\mathcal{Q}$  if and only if  $\text{Gap}_{\mathcal{L}}(\mathbf{X}^*) \leq \varepsilon$ .

### 3 The matrix multiplicative weights algorithm

Throughout the sequel, we will focus on how the players of a quantum game can learn a Nash equilibrium. In the context of two-player, zero-sum quantum games, the state-of-the-art method is based on the so-called *matrix multiplicative weights* (MMW) algorithm [21, 23, 45] which updates as

$$\mathbf{Y}_{i,t+1} = \mathbf{Y}_{i,t} + \gamma_t \mathbf{V}_i(\mathbf{X}_t) \quad \mathbf{X}_{i,t} = \frac{\exp(\mathbf{Y}_{i,t})}{\text{tr}[\exp(\mathbf{Y}_{i,t})]} \quad (\text{MMW})$$

In the above, (a)  $\mathbf{X}_t = (\mathbf{X}_{1,t}, \mathbf{X}_{2,t})$  denotes the players’ density matrix profile at each stage  $t = 1, 2, \dots$  of the process; (b)  $\mathbf{V}_i(\mathbf{X}_t)$  is the payoff gradient of player  $i \in \mathcal{N}$  under  $\mathbf{X}_t$ ; (c)  $\mathbf{Y}_t$  is an auxiliary state matrix that aggregates gradient steps over time; and (d)  $\gamma_t > 0$ ,  $t = 1, 2, \dots$ , is a learning rate (or step-size) parameter that can be freely tuned by the players.

As we mentioned in the introduction, this algorithm has a long history in the learning literature, going back at least to [7, 45] for matrix learning. Importantly, as stated, (MMW) requires *full information* at the player end: specifically, at each stage  $t = 1, 2, \dots$  of the process, each player  $i \in \mathcal{N}$  must receive their individual payoff gradient  $\mathbf{V}_i(\mathbf{X}_t)$  in order to perform the gradient update step in (MMW). Under this assumption, Jain & Watrous [21] showed that the induced empirical frequency of play

$$\bar{\mathbf{X}}_T = \frac{1}{T} \sum_{t=1}^T \mathbf{X}_t \quad (8)$$

converges to NE at a rate of  $\mathcal{O}(1/\sqrt{T})$ . Formally, adapted to our setting and notation, Jain & Watrous [21] provide the following explicit guarantee:

174 **Theorem 1** (Jain & Watrous [21]). Suppose that each player of a 2-player zero-sum game  $\mathcal{Q}$  follows  
 175 (MMW) for  $T$  epochs with learning rate  $\gamma = G^{-1}\sqrt{2H/T}$  where  $H = \log(d_1 d_2)$ . Then the players’  
 176 empirical frequency of play enjoys the bound

$$\text{Gap}_{\mathcal{L}}(\bar{\mathbf{X}}_T) \leq G\sqrt{2H/T} \quad (9)$$

177 In particular, if (MMW) is run for  $T = \mathcal{O}(1/\varepsilon^2)$  iterations,  $\bar{\mathbf{X}}_T$  will be an  $\varepsilon$ -Nash equilibrium of  $\mathcal{Q}$ .

178 To the best of our knowledge, the above guarantee of Jain & Watrous [21] remains the tightest  
 179 known bound for Nash equilibrium learning in 2-player zero-sum quantum games. At the same  
 180 time, Theorem 1 relies crucially on the players having full information on their individual gradients –  
 181 which, among others, might entail full knowledge of the game, full observation of the other player’s  
 182 density matrix, etc. Our goal in the sequel will be to relax precisely this assumption and develop a  
 183 payoff-based, gradient-free variant of (MMW) that can be employed without stringent information  
 184 and observability requirements as above.

## 185 4 Matrix learning without matrix feedback

186 As we stated above, an online learning framework, it is more realistic to assume that players observe  
 187 only the *outcome* of their actions – i.e., their individual payoffs. In this information-starved, payoff-  
 188 based learning setting, our main goal will be to employ a *minimal-information matrix multiplicative*  
 189 *weights* (3MW) algorithm that updates as

$$\mathbf{Y}_{i,t+1} = \mathbf{Y}_{i,t} + \gamma_t \hat{\mathbf{V}}_{i,t} \quad \mathbf{X}_{i,t} = \frac{\exp(\mathbf{Y}_{i,t})}{\text{tr}[\exp(\mathbf{Y}_{i,t})]} \quad (3\text{MW})$$

190 where  $\hat{\mathbf{V}}_{i,t}$  is some payoff-based estimate of the payoff gradient  $\mathbf{V}_i(\mathbf{X}_t)$  of player  $i$  at  $\mathbf{X}_t$ , and all  
 191 other quantities are defined as per (MMW). In this regard, the main challenge that arises is how to  
 192 reconstruct each player’s payoff gradient matrices when this information is not readily available by  
 193 an oracle (or other full-information mechanism).

194 **4.1. The classical approach: Importance weighted estimators.** In the context of classical, finite  
 195 games and multi-armed bandits, a standard approach for reconstructing  $\hat{\mathbf{V}}_{i,t}$  is via the so-called  
 196 *importance weighted estimator* (IWE) [8, 10, 26]. To state it in the context of finite games, assume  
 197 that each player has at their disposal a finite set of *pure strategies*  $\alpha_i \in \mathcal{A}_i$ , and if each player plays  
 198  $\hat{\alpha}_i \in \mathcal{A}_i$ , then, in obvious notation, their individual payoff will be  $\hat{u}_i = u_i(\hat{\alpha}_i; \hat{\alpha}_{-i})$ . Then, if each  
 199 player is using a mixed strategy  $x_i \in \Delta(\mathcal{A}_i)$  to draw their chosen action  $\hat{\alpha}_i$ , the *importance weighted*  
 200 *estimator* (IWE) for the payoff of the (possibly unplayed) action  $\alpha_i \in \mathcal{A}_i$  of player  $i$  is defined as

$$\text{IWE}_{i\alpha_i} = \frac{\mathbb{1}\{\alpha_i = \hat{\alpha}_i\}}{x_{i\alpha_i}} u_i(\hat{\alpha}_i; \hat{\alpha}_{-i}) \quad \text{for all } \alpha_i \in \mathcal{A}_i \quad (\text{IWE})$$

201 with the assumption that  $x_i$  has full support, i.e., each action  $\alpha_i \in \mathcal{A}_i$  has strictly positive probability  
 202  $x_{i\alpha_i}$  of being chosen by the  $i$ -th player.<sup>1</sup>

203 This approach has proven extremely fruitful in the context of multi-armed bandits and finite games  
 204 where (IWE) is an essential ingredient of the optimal algorithms for each context [5, 8, 26, 50].  
 205 However, in our case, there are two insurmountable difficulties in extending (IWE) to a quantum  
 206 context: First and foremost, the quantum regime is characterized by a *continuum* of pure states with  
 207 highly correlated payoffs (in the sense that quantum states that are close in the Bloch sphere will have  
 208 highly correlated POVM payoff observables); this comes in stark contrast to the classical regime of  
 209 finite normal-form games, where players only have to contend with a finite number of actions (with  
 210 no prior payoff correlations between them). Secondly, even after the realization of the pure states of  
 211 the players, there is an inherent uncertainty and randomness due to the quantum measurement process  
 212 that is involved in the payoff-generating process; as such, the players’ payoffs are also affected by an  
 213 exogenous source of randomness which is altogether absent from (IWE).

214 Our approach to tackle these issues will be to exploit the reformulation of a quantum game as a  
 215 continuous game with multilinear payoffs over the spectraplex (or, rather, a product thereof), and  
 216 use ideas from bandit convex optimization – in the spirit of [17, 25] – to estimate the players’ payoff  
 217 gradients with minimal, scalar information requirements.

<sup>1</sup>The assumption that  $x_{i,t}$  has full support is only for technical reasons. In practice, it can be relaxed by using IWE with explicit exploration – see [26] for more details.



218 **4.2. Gradient estimation via finite-difference quotients on the spectraplex.** To provide some  
 219 intuition for the analysis to come, consider first a single-variable smooth function  $f: \mathbb{R} \rightarrow \mathbb{R}$  and a  
 220 point  $x \in \mathbb{R}$ . Then, for error tolerance  $\delta > 0$ , a two-point estimate of the derivative of  $f$  at  $x$  is given  
 221 by the expression

$$\hat{f}_x = \frac{f(x + \delta) - f(x - \delta)}{2\delta} \quad (10)$$

222 Going to higher dimensions, letting  $f: \mathbb{R}^d \rightarrow \mathbb{R}$  be a smooth function,  $\{e_1, \dots, e_d\}$  be the standard  
 223 basis of  $\mathbb{R}^d$  and  $s$  drawn from  $\{e_1, \dots, e_d\}$  uniformly at random, the estimator

$$\hat{f}_x = \frac{d}{2\delta} [f(x + \delta s) - f(x - \delta s)]s \quad (11)$$

224 is a  $\mathcal{O}(\delta)$ -approximation of the gradient, i.e.,  $\|\mathbb{E}_s[\hat{f}_x] - \nabla f(x)\|_F = \mathcal{O}(\delta)$ . This idea is the basis of  
 225 the Kiefer–Wolfowitz stochastic approximation scheme [24] and will be the backbone of our work.

226 Now, to employ this type of estimator for a function over the set of density matrices  $\mathcal{X}$  in  $\mathbb{H}^d$ , we  
 227 need to ensure two things: (i) the feasibility of the *sampling direction*, and (ii) the feasibility of the  
 228 *evaluation point*. The first caveat is due to the fact that the set of the density matrices forms a lower  
 229 dimensional manifold in the set of Hermitian operators, and therefore, not all directions from a base  
 230 of  $\mathbb{H}^d$  are feasible. The second one is due to the fact that  $\mathcal{X}$  is bounded, thus, even if the sampling  
 231 direction is feasible, the evaluation point can lie outside the set  $\mathcal{X}$ . We proceed to ensure all this in a  
 232 series of concrete steps below.

233 **Sampling Directions.** We begin with the issue of defining a proper sampling set for the estimator’s  
 234 finite-difference directions. To that end, we will first construct an orthonormal basis of the tangent  
 235 hull  $\mathcal{Z} = \{\mathbf{Z} \in \mathbb{H}^d : \text{tr } \mathbf{Z} = 0\}$  of  $\mathcal{X}$ , i.e., the subspace of traceless matrices of  $\mathbb{H}^d$ . Note that if  
 236  $\mathbf{Z} \in \mathcal{Z}$  then for any  $\mathbf{X} \in \mathbb{H}^d$  it holds (a)  $\mathbf{X} + \mathbf{Z} \in \mathbb{H}^d$ , and (b)  $\text{tr}[\mathbf{X} + \mathbf{Z}] = \text{tr}[\mathbf{X}]$ .

237 Denoting by  $\Delta_{k\ell} \in \mathbb{H}^d$  the matrix with 1 in the  $(k, \ell)$ -position and 0’s everywhere else, it is easy to  
 238 see that the set  $\{\{\Delta_{jj}\}_{j=1}^d, \{\mathbf{e}_{k\ell}\}_{k < \ell}, \{\tilde{\mathbf{e}}_{k\ell}\}_{k < \ell}\}$  is an orthonormal basis of  $\mathbb{H}^d$ , where

$$\mathbf{e}_{k\ell} = \frac{1}{\sqrt{2}}\Delta_{k\ell} + \frac{1}{\sqrt{2}}\Delta_{\ell k} \quad \text{and} \quad \tilde{\mathbf{e}}_{k\ell} = \frac{i}{\sqrt{2}}\Delta_{k\ell} - \frac{i}{\sqrt{2}}\Delta_{\ell k} \quad (12)$$

239 for  $1 \leq k < \ell \leq d$ , where  $i$  is the imaginary unit with  $i^2 = -1$ . The next proposition provides a basis  
 240 for the subspace  $\mathcal{Z}$ , whose proof lies in the appendix.

241 **Proposition 1.** Let  $\mathbf{E}_j$  be defined as  $\mathbf{E}_j = \frac{1}{\sqrt{j(j+1)}}(\Delta_{11} + \dots + \Delta_{jj} - j\Delta_{j+1,j+1})$  for  $j = 1, \dots, d-1$ .

242 Then, the set  $\mathcal{E} = \{\{\mathbf{E}_j\}_{j=1}^{d-1}, \{\mathbf{e}_{k\ell}\}_{k < \ell}, \{\tilde{\mathbf{e}}_{k\ell}\}_{k < \ell}\}$  is an orthonormal basis of  $\mathcal{Z}$ .

243 In the sequel, we will use this basis as an orthonormal sampler from which to pick the finite-difference  
 244 directions for the estimation of  $\mathbf{V}$ .

245 **Feasibility Adjustment.** After establishing an orthonormal basis for  $\mathcal{Z}$  as per Proposition 1, we  
 246 readily get that for any  $\mathbf{X} \in \mathcal{X}$ , any  $\mathbf{Z} \in \mathcal{E}^\pm := \{\{\pm \mathbf{E}_j\}_{j=1}^{d-1}, \{\pm \mathbf{e}_{k\ell}\}_{k < \ell}, \{\pm \tilde{\mathbf{e}}_{k\ell}\}_{k < \ell}\}$  and  $\delta > 0$ , the  
 247 point  $\mathbf{X} + \delta \mathbf{Z}$  belongs to  $\mathcal{Z}$ . However, depending on the value of the exploration parameter  $\delta$  and the  
 248 distance of  $\mathbf{X}$  from the boundary of  $\mathcal{X}$ , the point  $\mathbf{X} + \delta \mathbf{Z} \in \mathbb{H}^d$  may fail to lie in  $\mathcal{X}$  due to violation  
 249 of the positive-semidefinite condition. On that account, we now treat the latter restriction, i.e., the  
 250 feasibility of the *evaluation point*.

251 To tackle this, the idea is to transfer the point  $\mathbf{X}$  toward the interior of  $\mathcal{X}$  and move along the sampled  
 252 direction from there. For this, we need to find a reference point  $\mathbf{R} \in \text{ri}(\mathcal{X})$  and a “safety net”  $r > 0$   
 253 such that  $\mathbf{R} + r\mathbf{Z} \in \mathcal{X}$  for any  $\mathbf{Z} \in \mathcal{E}^\pm$ . Then, for  $\delta \in (0, r)$ , the point

$$\mathbf{X}^{(\delta)} := \mathbf{X} + \frac{\delta}{r}(\mathbf{R} - \mathbf{X}) \quad (13)$$

254 lies in  $\text{ri}(\mathcal{X})$ , and moving along  $\mathbf{Z} \in \mathcal{E}^\pm$ , the point  $\mathbf{X}^{(\delta)} + \delta \mathbf{Z} = (1 - \frac{\delta}{r})\mathbf{X} + \frac{\delta}{r}(\mathbf{R} + r\mathbf{Z})$  remains  
 255 in  $\mathcal{X}$  as a convex combination of two elements in  $\mathcal{X}$ . The following proposition provides an exact  
 256 expression for  $\mathbf{R}$  and  $r$ , which we will use next to guarantee the feasibility of the sampled iterates.

257 **Proposition 2.** Let  $\mathbf{R} = \frac{1}{d} \sum_{j=1}^d \Delta_{jj}$ . Then, for  $r = \min\left\{\frac{1}{\sqrt{d(d-1)}}, \frac{\sqrt{2}}{d}\right\}$ , it holds that  $\mathbf{R} + r\mathbf{Z} \in \mathcal{X}$  for  
 258 any direction  $\mathbf{Z} \in \mathcal{E}^\pm$ .

## 5 Bandit learning in zero-sum quantum games

With all these in hand, we are now ready to proceed to the presentation of the MMW with limited feedback information. To streamline our presentation, before delving into the more difficult “bandit feedback” case – where each player  $i \in \mathcal{N}$  only observes the realized payoff observable  $U_i(\omega)$  – we begin with the simpler case where players observe their mixed payoffs  $u_i$  at a given profile  $\mathbf{X} \in \mathcal{X}$ .

**5.1. Learning with mixed payoff observations.** Our main idea to exploit the observation of mixed payoffs and the finite-difference sampling to the fullest will be to introduce a “coordination phase” where players take a sampling step before updating their state variables and continue playing. In more detail, we will assume that players alternate between an “exploration” and an “exploitation” update that allows them to sample the landscape of  $\mathcal{L}$  efficiently at each iteration. Concretely, writing  $\mathbf{X}_t$  and  $\delta_t$  for the players’ state profile and sampling radius  $\delta_t$  at stage  $t = 1, 2, \dots$ , the sequence of events that we envision proceeds as follows:

**Step 1.** Draw a sampling direction  $\mathbf{Z}_{i,t} \in \mathcal{E}_i$  and  $s_{i,t} \in \{\pm 1\}$  uniformly at random.

**Step 2.** (a) Play  $\mathbf{X}_{i,t}^{(\delta)} + s_{i,t} \delta_t \mathbf{Z}_{i,t}$  and observe  $u_i(\mathbf{X}_t^{(\delta)} + s_t \delta_t \mathbf{Z}_t)$ .

(b) Play  $\mathbf{X}_{i,t}^{(\delta)} - s_{i,t} \delta_t \mathbf{Z}_{i,t}$  and observe  $u_i(\mathbf{X}_t^{(\delta)} - s_t \delta_t \mathbf{Z}_t)$ .

**Step 3.** Approximate  $\mathbf{V}_i(\mathbf{X}_t)$  via the *two-point estimator* (2PE):

$$\hat{\mathbf{V}}_{i,t} := \frac{D_i}{2\delta_t} \left[ u_i(\mathbf{X}_t^{(\delta)} + s_t \delta_t \mathbf{Z}_t) - u_i(\mathbf{X}_t^{(\delta)} - s_t \delta_t \mathbf{Z}_t) \right] s_{i,t} \mathbf{Z}_{i,t} \quad (2PE)$$

where  $D_i = d_i^2 - 1$  is the dimension of  $\mathbb{H}^{d_i}$ , and  $D := \max_{i \in \mathcal{N}} D_i$ .

The main guarantee of the resulting algorithm (3MW) + (2PE) may then be stated as follows:

**Theorem 2.** Suppose that each player of a 2-player zero-sum game  $\mathcal{Q}$  follows (3MW) for  $T$  epochs with learning rate  $\gamma$ , sampling radius  $\delta$ , and gradient estimates provided by (2PE). Then the players’ empirical frequency of play enjoys the duality gap guarantee

$$\mathbb{E}[\text{Gap}_{\mathcal{L}}(\bar{\mathbf{X}}_T)] \leq \frac{H}{\gamma T} + 8D^2 G^2 \gamma + 16DL\delta \quad (14)$$

where  $H = \log(d_1 d_2)$ . In particular, for  $\gamma = (DG)^{-1} \sqrt{H/(8T)}$  and  $\delta = (G/L) \sqrt{H/(8T)}$ , the players enjoy the equilibrium convergence guarantee

$$\mathbb{E}[\text{Gap}_{\mathcal{L}}(\bar{\mathbf{X}}_T)] \leq 8DG \sqrt{2H/T}. \quad (15)$$

Compared to Theorem 1, the convergence rate (15) of Theorem 2 is quite significant because it only differs by a factor which is linear in the dimension of the ambient space and otherwise maintains the same  $\mathcal{O}(\sqrt{T})$  dependence on the algorithm’s runtime. In this regard, Theorem 2 shows that the “explore-exploit” sampler underlying (2PE) is essentially as powerful as the full information framework of Jain & Watrous [21] – and this, despite the fact that players no longer require access to the gradient matrix  $\mathbf{V}$  of  $\mathcal{L}$ . This echoes a range of previous findings in stochastic convex optimization for the efficiency of two-point samplers [3, 41], a similarity we find particularly surprising given the stark differences between the two settings – non-commutativity, min-max versus min-min landscape. The key ingredients for the equilibrium convergence rate of Theorem 2 are the two technical results below. The first is a feedback-agnostic “energy inequality” which is tied to the update structure of (MMW) and is stated in terms of the quantum relative entropy function

$$D(\mathbf{P}, \mathbf{X}) = \text{tr}[\mathbf{P}(\log \mathbf{P} - \log \mathbf{X})] \quad (16)$$

for  $\mathbf{P}, \mathbf{X} \in \mathcal{X}$  with  $\mathbf{X} > 0$ . Concretely, we have the following estimate.

**Lemma 1.** Fix some  $\mathbf{P} \in \mathcal{X}$ , and let  $\mathbf{X}_t, \mathbf{X}_{t+1}$  be two successive iterates of (3MW), without any assumptions for the input sequence  $\hat{\mathbf{V}}_t$ . We then have

$$D(\mathbf{P}, \mathbf{X}_{t+1}) \leq D(\mathbf{P}, \mathbf{X}_t) + \gamma_t \text{tr}[\hat{\mathbf{V}}_t(\mathbf{X}_t - \mathbf{P})] + \frac{\gamma_t^2}{2} \|\hat{\mathbf{V}}_t\|_F^2. \quad (17)$$

The proof of Lemma 1 follows established techniques in the theory of (MMW), so we defer a detailed discussion to the appendix. The second result that we will need is tailored to the estimator (2PE) and provides a tight estimate of its moments conditioned on the history  $\mathcal{F}_t = \mathcal{F}(\mathbf{X}_1, \dots, \mathbf{X}_t)$  of  $\mathbf{X}_t$ .

---

**Algorithm 1:** MMW with bandit feedback

---

```

1: Input:  $\mathbf{Y}_1 \leftarrow 0$ ; safety parameter  $r_i$  and anchor point  $\mathbf{R}_i, i \in \mathcal{N}$ ; step-size  $\gamma_t$ ; sampling radius  $\delta_t$ 
2: for  $t = 1, 2, \dots$  do simultaneously for all  $i \in \mathcal{N}$ 
3:   Set  $\mathbf{X}_{i,t} = \exp(\mathbf{Y}_{i,t}) / \text{tr}[\exp(\mathbf{Y}_{i,t})]$ .
4:   Sample  $\mathbf{Z}_{i,t}$  uniformly from  $\mathcal{E}_i^\pm$ .
5:   Play  $\mathbf{X}_{i,t}^{(\delta)} + \delta_t \mathbf{Z}_{i,t}$ .
6:   Observe  $U_i(\omega_t)$ .
7:   Set  $\hat{\mathbf{V}}_{i,t} := D_i / \delta_t \cdot U_i(\omega_t) \mathbf{Z}_{i,t}$ .
8:   Update  $\mathbf{Y}_{i,t+1} \leftarrow \mathbf{Y}_{i,t} + \gamma_t \hat{\mathbf{V}}_{i,t}$ .
9: end for

```

---

299 **Proposition 3.** *The estimator (2PE) enjoys the conditional bounds*

$$(i) \quad \|\mathbb{E}[\hat{\mathbf{V}}_t | \mathcal{F}_t] - \mathbf{V}(\mathbf{X}_t)\|_F \leq 4DL\delta_t \quad \text{and} \quad (ii) \quad \mathbb{E}[\|\hat{\mathbf{V}}_t\|_F^2 | \mathcal{F}_t] \leq 16D^2G^2 \quad (18)$$

300 The defining element in Proposition 3 is that even though the estimator (2PE) is biased, its second  
301 moment is bounded as  $\mathcal{O}(1)$ . This is ultimately due to the multilinearity of the players' payoff  
302 functions and plays a pivotal role in showing that the duality gap of  $\bar{\mathbf{X}}_t$  under (3MW) is of the same  
303 order as under (MMW), because the bias can be controlled with affecting the variance of the estimator.  
304 We provide a detailed proof of Lemma 1, Proposition 3, and Theorem 2 in the appendix.

305 **5.2. Learning with bandit feedback.** Despite its strong convergence guarantees, a major limiting  
306 factor in the applicability of Theorem 2 is that, in many cases, the game's players may only be able to  
307 observe their realized payoff observables  $U_i(\omega)$ , and their mixed payoffs  $u_i(\mathbf{X})$  could be completely  
308 inaccessible. In particular, as we described in Section 2, each outcome  $\omega \in \Omega$  of the POVM occurs  
309 with probability  $P_\omega(\mathbf{X}_t)$  under the strategy profile  $\mathbf{X}_t$ . Accordingly, if this is the only information  
310 available to the players, they will need to estimate their individual payoff gradients through the single  
311 observation of the (random) scalar  $U_i(\omega_t) \in \mathbb{R}$ . In view of this, inspired by the single-point stochastic  
312 approximation approach of [17, 43] for *single-agent* online optimization problems with *perfect* value  
313 queries, we will consider the following sequence of events:

- 314 **Step 1.** Each player draws a sampling direction  $\mathbf{Z}_{i,t} \in \mathcal{E}_i^\pm$  uniformly at random.  
315 **Step 2.** Each player plays  $\mathbf{X}_{i,t}^{(\delta)} + \delta_t \mathbf{Z}_{i,t}$ .  
316 **Step 3.** Each player receives  $U_i(\omega_t)$ .  
317 **Step 4.** Each player approximates  $\mathbf{V}_i(\mathbf{X}_t)$  via the *one-point estimator* (1PE):

$$\hat{\mathbf{V}}_{i,t} := \frac{D_i}{\delta_t} U_i(\omega_t) \mathbf{Z}_{i,t} \quad (1PE)$$

318 In this case, the players' gradient estimates may be bounded as follows:

319 **Proposition 4.** *The estimator (1PE) enjoys the conditional bounds*

$$(i) \quad \|\mathbb{E}[\hat{\mathbf{V}}_t | \mathcal{F}_t] - \mathbf{V}(\mathbf{X}_t)\|_F \leq 4DL\delta_t \quad \text{and} \quad (ii) \quad \mathbb{E}[\|\hat{\mathbf{V}}_t\|_F^2 | \mathcal{F}_t] \leq 4D^2B^2/\delta_t^2. \quad (19)$$

320 The crucial difference between Propositions 3 and 4 is that the former leads to a gradient estimator  
321 with  $\mathcal{O}(1)$  variance and magnitude, whereas the magnitude of the latter is inversely proportional  
322 to  $\delta_t$ ; however, since  $\delta_t$  in turn controls the *bias* of the gradient estimator, we must now resolve a  
323 bias-variance dilemma, which was absent in the case of (2PE). This leads to the following variant of  
324 Theorem 2 with bandit, realization-based feedback:

325 **Theorem 3.** *Suppose that each player of a 2-player zero-sum game  $\mathcal{Q}$  follows (3MW) for  $T$  epochs  
326 with learning rate  $\gamma$ , sampling radius  $\delta$ , and gradient estimates provided by (1PE). Then the players'  
327 empirical frequency of play enjoys the duality gap guarantee*

$$\mathbb{E}[\text{Gap}_{\mathcal{L}}(\bar{\mathbf{X}}_T)] \leq \frac{H}{\gamma T} + \frac{2D^2B^2\gamma}{\delta^2} + 16DL\delta \quad (20)$$

328 where  $H = \log(d_1 d_2)$ . In particular, for  $\gamma = \left(\frac{H}{2T}\right)^{3/4} \frac{1}{2D\sqrt{BL}}$  and  $\delta = \left(\frac{H}{2T}\right)^{1/4} \sqrt{\frac{B}{4L}}$ , the players enjoy  
329 the equilibrium convergence guarantee:

$$\mathbb{E}[\text{Gap}_{\mathcal{L}}(\bar{\mathbf{X}}_T)] \leq \frac{2^{3/4} 8H^{1/4} D\sqrt{BL}}{T^{1/4}}. \quad (21)$$



330 An important observation here is that the players’ equilibrium convergence rate under (3MW) + (1PE)  
 331 no longer matches the convergence rate of the vanilla MMW algorithm (Theorem 1). The reason  
 332 for this is the bias-variance trade-off in the estimator (1PE), and is reminiscent of the drop in the  
 333 rate of regret minimization from  $\mathcal{O}(T^{1/2})$  to  $\mathcal{O}(T^{2/3})$  under (IWE) with bandit feedback and explicit  
 334 exploration in finite games. A kernel-based approach in the spirit of Bubeck et al. [9] could possibly  
 335 be used to fill the  $\mathcal{O}(T^{1/4})$  gap between Theorems 1 and 3, but this would come at the cost of a  
 336 possibly catastrophic dependence on the dimension (which is already quadratic in our setting). This  
 337 consideration is beyond the scope of our work, but it would constitute an important future direction.

## 338 6 Bandit learning in $N$ -player quantum games

339 We conclude our paper with an examination of the behavior of the MMW algorithm in general,  
 340  $N$ -player quantum games. Here, a major difficulty that arises is that, in stark contrast to the min-max  
 341 case, the set of the game’s equilibria can be disconnected, so any convergence result will have to  
 342 be, by necessity, local. In addition, because general  $N$ -games do not have the amenable profile of a  
 343 bilinear min-max problem – they are multilinear, multi-objective problems – it will not be possible  
 344 to obtain any convergence guarantees for the game’s empirical frequency of play (since there is no  
 345 convex structure to exploit). Instead, we will have to focus squarely on the induced trajectory of play,  
 346 which carries with it a fair share of complications.

347 Inspired by the very recent work of [32], we will not constrain our focus to a specific class of *games*,  
 348 but to a specific class of *equilibria*. In particular, we will consider the behavior of MMW-based  
 349 learning with respect to Nash equilibria  $\mathbf{X}^* \in \mathcal{X}$  that satisfy the *variational stability* condition

$$\text{tr}[\mathbf{V}(\mathbf{X})(\mathbf{X} - \mathbf{X}^*)] < 0 \quad \text{for all } \mathbf{X} \in \mathcal{U} \setminus \{\mathbf{X}^*\}. \quad (\text{VS})$$

350 This condition can be traced back to [35], and can be seen as a game-theoretic analogue of first-order  
 351 stationarity in the context of continuous optimization, or as an equilibrium refinement in the spirit  
 352 of the seminal concept of *evolutionary stability* in population games [33, 34].<sup>2</sup> Importantly, as was  
 353 shown in [32], variationally stable equilibria are the only equilibria that are asymptotically stable  
 354 under the *continuous-time* dynamics of the “follow the regularized leader” (FTRL) class of learning  
 355 policies, so it stands to reason to ask whether they enjoy a similar convergence landscape in the  
 356 context of bona fide, discrete-time learning with minimal, payoff-based feedback.

357 Our final result provides an unambiguously positive answer to this question:<sup>3</sup>

358 **Theorem 4.** *Fix some tolerance level  $\eta \in (0, 1)$  and suppose that the players of an  $N$ -player quantum*  
 359 *game follow (3MW) with bandit, realization-based feedback, and surrogate gradients provided by*  
 360 *the estimator (1PE) with step-size and sampling radius parameters such that*

$$(i) \sum_{t=1}^{\infty} \gamma_t = \infty, \quad (ii) \sum_{t=1}^{\infty} \gamma_t \delta_t < \infty, \quad \text{and} \quad (iii) \sum_{t=1}^{\infty} \gamma_t^2 / \delta_t^2 < \infty. \quad (22)$$

361 *If  $\mathbf{X}^*$  is variationally stable, there exists a neighborhood  $\mathcal{U}$  of  $\mathbf{X}^*$  such that*

$$\mathbf{P}(\lim_{t \rightarrow \infty} \mathbf{X}_t = \mathbf{X}^*) \geq 1 - \eta \quad \text{whenever } \mathbf{X}_1 \in \mathcal{U}. \quad (23)$$

362 It is worth noting that the last-iterate convergence guarantee of Theorem 4 is considerably stronger  
 363 than the time-averaged variants of Theorems 1–3, and we are not aware of any comparable conver-  
 364 gence guarantee for general quantum games. [Trivially, last-iterate convergence implies time-averaged  
 365 convergence, but the converse, of course, may fail to hold] As such, especially in cases that require  
 366 to track the trajectory of the system or the players’ day-to-day rewards, Theorem 4 provides an  
 367 important guarantee for the realized sequence of events.

368 On the other hand, in contrast to Theorem 4, it should be noted that the guarantees of Theorems 1–3  
 369 are global. Given that general quantum games may in general possess a large number of disjoint  
 370 Nash equilibria, this transition from global to local convergence guarantees seems unavoidable. It is,  
 371 however, an open question whether (VS) could be exploited further in order to deduce the rate of  
 372 convergence to such equilibria; we leave this as a direction for future research.

<sup>2</sup>It should be noted here that, if reduced to the simplex, the stability condition (VS) is exactly equivalently to the variational characterization of evolutionarily stable states due to Taylor [44].

<sup>3</sup>Strictly speaking, the algorithms (3MW) and (1PE) have been stated in the context of 2-player games. The extension to  $N$ -player games is straightforward, so we do not present it here; for the details (which hide no subtleties), see the appendix.

- 374 [1] Aaronson, S. Shadow tomography of quantum states. *SIAM Journal on Computing*, 49(5), January 2020.
- 375 [2] Aaronson, S., Chen, X., Hazan, E., Kale, S., and Nayak, A. Online learning of quantum states. In *NeurIPS*
- 376 *'18: Proceedings of the 32nd International Conference of Neural Information Processing Systems*, 2018.
- 377 [3] Agarwal, A., Dekel, O., and Xiao, L. Optimal algorithms for online convex optimization with multi-point
- 378 bandit feedback. In *COLT '10: Proceedings of the 23rd Annual Conference on Learning Theory*, 2010.
- 379 [4] Arute, F., Arya, K., Babbush, R., Bacon, D., Bardin, J. C., Barends, R., Biswas, R., Boixo, S., Brandao,
- 380 F. G., Buell, D. A., Burkett, B., Chen, Y., Chen, Z., Chiaro, B., Collins, R., Courtney, W., Dunsworth, A.,
- 381 Farhi, E., Foxen, B., Fowler, A., Gidney, C., Giustina, M., Graff, R., Guerin, K., Habegger, S., Harrigan,
- 382 M. P., Hartmann, M. J., Ho, A., Hoffmann, M. R., Huang, T., Humble, T. S., Isakov, S. V., Jeffrey, E., Jiang,
- 383 Z., Kafri, D., Kechedzhi, K., Kelly, J., Klimov, P. V., Knysh, S., Korotkov, A. N., Kostritsa, F., Landhuis,
- 384 D., Lindmark, M., Lucero, E., Lyakh, D., Mandra, S., McClean, J. R., McEwen, M., Megrant, A., Mi,
- 385 X., Michielsen, K., Mohseni, M., Mutus, J., Naaman, O., Neeley, M., Neill, C., Niu, M. Y., Ostby, E.,
- 386 Petukhov, A., Platt, J. C., Quintana, C., Rieffel, E. G., Roushan, P., Rubin, N. C., Sank, D., Satzinger,
- 387 K. J., Smelyanskiy, V., Sung, K. J., Trevithick, M. D., Vainsencher, A., Villalonga, B., White, T., Yao,
- 388 Z. J., Yeh, P., Zalcman, A., Neven, H., and Martinis, J. M. Quantum supremacy using a programmable
- 389 superconducting processor. *Nature*, 2019.
- 390 [5] Audibert, J.-Y. and Bubeck, S. Regret bounds and minimax policies under partial monitoring. *Journal of*
- 391 *Machine Learning Research*, 11:2635–2686, 2010.
- 392 [6] Auer, P., Cesa-Bianchi, N., Freund, Y., and Schapire, R. E. Gambling in a rigged casino: The adversarial
- 393 multi-armed bandit problem. In *Proceedings of the 36th Annual Symposium on Foundations of Computer*
- 394 *Science*, 1995.
- 395 [7] Beck, A. and Teboulle, M. Mirror descent and nonlinear projected subgradient methods for convex
- 396 optimization. *Operations Research Letters*, 31(3):167–175, 2003.
- 397 [8] Bubeck, S. and Cesa-Bianchi, N. Regret analysis of stochastic and nonstochastic multi-armed bandit
- 398 problems. *Foundations and Trends in Machine Learning*, 5(1):1–122, 2012.
- 399 [9] Bubeck, S., Lee, Y. T., and Eldan, R. Kernel-based methods for bandit convex optimization. In *STOC '17:*
- 400 *Proceedings of the 49th annual ACM SIGACT symposium on the Theory of Computing*, 2017.
- 401 [10] Cesa-Bianchi, N. and Lugosi, G. *Prediction, Learning, and Games*. Cambridge University Press, 2006.
- 402 [11] Chakrabarti, S., Huang, Y., Li, T., Feizi, S., and Wu, X. Quantum Wasserstein generative adversarial
- 403 networks. In *NeurIPS '19: Proceedings of the 33rd International Conference on Neural Information*
- 404 *Processing Systems*, 2019.
- 405 [12] Chen, X., Hazan, E., Li, T., Lu, Z., Wang, X., and Yang, R. Adaptive online learning of quantum states,
- 406 2022.
- 407 [13] Chuang, I. and Nielsen, M. *Quantum Computation and Quantum Information*. Cambridge University
- 408 Press, 2 edition, 2010.
- 409 [14] Dallaire-Demers, P.-L. and Killoran, N. Quantum generative adversarial networks. *Physical Review A*, 98
- 410 (1):012324, 2018.
- 411 [15] Debreu, G. A social equilibrium existence theorem. *Proceedings of the National Academy of Sciences of*
- 412 *the USA*, October 1952.
- 413 [16] Eisert, J., Wilkens, M., and Lewenstein, M. Quantum games and quantum strategies. *Physical Review*
- 414 *Letters*, 83, October 1999.
- 415 [17] Flaxman, A. D., Kalai, A. T., and McMahan, H. B. Online convex optimization in the bandit setting:
- 416 gradient descent without a gradient. In *SODA '05: Proceedings of the 16th annual ACM-SIAM Symposium*
- 417 *on Discrete Algorithms*, pp. 385–394, 2005.
- 418 [18] Folland, G. B. *Real Analysis*. Wiley-Interscience, 2 edition, 1999.
- 419 [19] Gutoski, G. and Watrous, J. Toward a general theory of quantum games. In *STOC '07: Proceedings of the*
- 420 *39th annual ACM symposium on the Theory of Computing*, 2007.
- 421 [20] Hall, P. and Heyde, C. C. *Martingale Limit Theory and Its Application*. Probability and Mathematical
- 422 Statistics. Academic Press, New York, 1980.
- 423 [21] Jain, R. and Watrous, J. Parallel approximation of non-interactive zero-sum quantum games. In *CCC '09:*
- 424 *Proceedings of the 2009 IEEE International Conference on Computational Complexity*, 2009.
- 425 [22] Jain, R., Piliouras, G., and Sim, R. Matrix multiplicative weights updates in quantum games: Conservation
- 426 law & recurrence. In *NeurIPS '22: Proceedings of the 36th International Conference on Neural Information*
- 427 *Processing Systems*, 2022.
- 428 [23] Kakade, S. M., Shalev-Shwartz, S., and Tewari, A. Regularization techniques for learning with matrices.
- 429 *The Journal of Machine Learning Research*, 13:1865–1890, 2012.

- [24] Kiefer, J. and Wolfowitz, J. Stochastic estimation of the maximum of a regression function. *The Annals of Mathematical Statistics*, 23(3):462–466, 1952.
- [25] Kleinberg, R. D. Nearly tight bounds for the continuum-armed bandit problem. In *NIPS' 04: Proceedings of the 18th Annual Conference on Neural Information Processing Systems*, 2004.
- [26] Lattimore, T. and Szepesvári, C. *Bandit Algorithms*. Cambridge University Press, Cambridge, UK, 2020.
- [27] Li, T., Chakrabarti, S., and Wu, X. Sublinear quantum algorithms for training linear and kernel-based classifiers. In *International Conference on Machine Learning*, 2019.
- [28] Li, T., Wang, C., Chakrabarti, S., and Wu, X. Sublinear classical and quantum algorithms for general matrix games. *Proceedings of the AAAI Conference on Artificial Intelligence*, 35(10), May 2021. doi: 10.1609/aaai.v35i10.17028.
- [29] Lin, W., Piliouras, G., Sim, R., and Varvitsiotis, A. Quantum potential games, replicator dynamics, and the separability problem, 2023.
- [30] Littlestone, N. and Warmuth, M. K. The weighted majority algorithm. *Information and Computation*, 108(2):212–261, 1994.
- [31] Lloyd, S. and Weedbrook, C. Quantum generative adversarial learning. *Physical Review Letters*, 121(4), July 2018.
- [32] Lotidis, K., Mertikopoulos, P., and Bambos, N. Learning in quantum games, 2023.
- [33] Maynard Smith, J. *Evolution and the Theory of Games*. Cambridge University Press, Cambridge, 1982.
- [34] Maynard Smith, J. and Price, G. R. The logic of animal conflict. *Nature*, 246:15–18, November 1973.
- [35] Mertikopoulos, P. and Zhou, Z. Learning in games with continuous action sets and unknown payoff functions. *Mathematical Programming*, 173(1-2):465–507, January 2019.
- [36] Meyer, D. A. Quantum strategies. *Physical Review Letters*, 82(5):1052–1055, February 1999.
- [37] Nemirovski, A. S. and Yudin, D. B. *Problem Complexity and Method Efficiency in Optimization*. Wiley, New York, NY, 1983.
- [38] Nielsen, M. A. and Chuang, I. L. *Quantum Computation and Quantum Information: 10th Anniversary Edition*. Cambridge University Press, 2010. doi: 10.1017/CBO9780511976667.
- [39] Preskill, J. Quantum computing in the NISQ era and beyond. *Quantum*, 2:79, August 2018.
- [40] Robbins, H. and Siegmund, D. A convergence theorem for nonnegative almost supermartingales and some applications. In Rustagi, J. S. (ed.), *Optimizing Methods in Statistics*. Academic Press, New York, NY, 1971.
- [41] Shamir, O. An optimal algorithm for bandit and zero-order convex optimization with two-point feedback. *Journal of Machine Learning Research*, 18(52):1–11, 2017.
- [42] Sion, M. On general minimax theorems. *Pacific Journal of Mathematics*, 8(1):171 – 176, 1958.
- [43] Spall, J. C. Multivariate stochastic approximation using a simultaneous perturbation gradient approximation. *IEEE Trans. Autom. Control*, 37(3):332–341, March 1992.
- [44] Taylor, P. D. Evolutionarily stable strategies with two types of player. *Journal of Applied Probability*, 16(1):76–83, March 1979.
- [45] Tsuda, K., Rätsch, G., and Warmuth, M. K. Matrix exponentiated gradient updates for on-line Bregman projection. *Journal of Machine Learning Research*, 6:995–1018, 2005.
- [46] van Apeldoorn, J. and Gily'en, A. Quantum algorithms for zero-sum games. *arXiv: Quantum Physics*, 2019.
- [47] Vovk, V. G. Aggregating strategies. In *COLT '90: Proceedings of the 3rd Workshop on Computational Learning Theory*, pp. 371–383, 1990.
- [48] Yu, Y.-L. The strong convexity of von Neumann's entropy. 2015.
- [49] Zhong, H.-S., Wang, H., Deng, Y.-H., Chen, M.-C., Peng, L.-C., Luo, Y.-H., Qin, J., Wu, D., Ding, X., Hu, Y., Hu, P., Yang, X.-Y., Zhang, W.-J., Li, H., Li, Y., Jiang, X., Gan, L., Yang, G., You, L., Wang, Z., Li, L., Liu, N.-L., Lu, C.-Y., and Pan, J.-W. Quantum computational advantage using photons. *Science*, 370(6523):1460–1463, December 2020.
- [50] Zimmert, J. and Seldin, Y. Tsallis-INF: An optimal algorithm for stochastic and adversarial bandits. *Journal of Machine Learning Research*, 22(28):1–49, 2021.

## Appendix

In the series of technical appendices that follow, we provide the missing proofs from the main part of our paper, and we provide some numerical illustrations of the performance of the proposed algorithms. As a roadmap, we begin in [Appendix A](#) with some auxiliary results that are required throughout our analysis. Subsequently, in [Appendices B–D](#), we provide the proofs of the results presented in [Sections 4–6](#) respectively. Finally, in [Appendix E](#), we provide a suite of numerical experiments to assess the practical performance of (3MW) using the estimators (2PE) and (1PE), and we compare it with the full information setting underlying (MMW).

### A Auxiliary Results

We now introduce some notation for quantum games in a  $N$ -player setting, and explain how the extension from the 2-player setting is straightforward.

**$N$ -player quantum games.** First of all, a quantum game  $\mathcal{Q}$  consists of a finite set of players  $i \in \mathcal{N} = \{1, \dots, N\}$ , where each player  $i \in \mathcal{N}$  has access to a complex Hilbert space  $\mathcal{H}_i \cong \mathbb{C}^{d_i}$ . The set of pure states is the unit sphere  $\Psi_i := \{\psi_i \in \mathcal{H}_i : \|\psi_i\|_F = 1\}$  of  $\mathcal{H}_i$ . We will write  $\Psi := \prod_i \Psi_i$  for the space of all ensembles  $\psi = (\psi_1, \dots, \psi_N)$  of pure states  $\psi_i \in \Psi_i$  that are independently prepared by each  $i \in \mathcal{N}$ .

In analogy with the 2-player case, each outcome  $\omega \in \Omega$  is associated to a positive semi-definite operator  $\mathbf{P}_\omega : \mathcal{H} \rightarrow \mathcal{H}$  defined on the tensor product  $\mathcal{H} := \otimes_i \mathcal{H}_i$  of the players' individual state spaces; we further assume that  $\sum_{\omega \in \Omega} \mathbf{P}_\omega = \mathbf{I}$ , thus, the probability of observing  $\omega \in \Omega$  at state  $\psi \in \Psi$  is

$$P_\omega(\psi) = \langle \psi_1 \otimes \dots \otimes \psi_N | \mathbf{P}_\omega | \psi_1 \otimes \dots \otimes \psi_N \rangle \quad (\text{A.1})$$

and, the player's expected payoff at state  $\psi \in \Psi$  will be

$$u_i(\psi) := \langle U_i \rangle \equiv \sum_{\omega \in \Omega} P_\omega(\psi) U_i(\omega) \quad (\text{A.2})$$

Similarly to the 2-player setting, if each player  $i \in \mathcal{N}$  prepares a density matrix  $\mathbf{X}_i$  as per (1), the expected payoff of player  $i \in \mathcal{N}$  under  $\mathbf{X} = (\mathbf{X}_1, \dots, \mathbf{X}_N)$  will be

$$u_i(\mathbf{X}) = \sum_{\omega \in \Omega} U_i(\omega) \text{tr}[\mathbf{P}_\omega \mathbf{X}_1 \otimes \dots \otimes \mathbf{X}_N] = \text{tr}[\mathbf{W}_i \mathbf{X}_1 \otimes \dots \otimes \mathbf{X}_N] \quad (\text{A.3})$$

where  $\mathbf{W}_i = \sum_{\omega \in \Omega} U_i(\omega) \mathbf{P}_\omega \in \mathcal{H}$  for  $i \in \mathcal{N}$ . Finally, we denote by  $\mathbf{V}_i(\mathbf{X})$  the individual payoff gradient of player  $i$  under  $\mathbf{X}$  as

$$\mathbf{V}_i(\mathbf{X}) := \nabla_{\mathbf{X}_i^\top} u_i(\mathbf{X}) \quad (\text{A.4})$$

All other notions are extended, accordingly.  $\diamond$

As noted in [Section 2](#), we define the norm  $\|A\|_F = \sqrt{\text{tr}[A^\dagger A]}$  for any  $A \in \mathbb{H}^{d_i}$ , i.e.,  $(\mathbb{H}^{d_i}, \|\cdot\|_F)$  is an inner-product space. With a slight abuse of notation, we define for  $\mathbf{X} = (\mathbf{X}_1, \dots, \mathbf{X}_N) \in \mathcal{X}$  its norm as:

$$\|\mathbf{X}\|_F = \sqrt{\sum_{i=1}^N \|\mathbf{X}_i\|_F^2} \quad (\text{A.5})$$

**Lemma A.1.** For any  $\mathbf{X}_i \in \mathcal{X}_i$ , it holds  $\|\mathbf{X}_i\|_F \leq 1$ , and  $\text{diam}(\mathcal{X}) = 2\sqrt{N}$ .

*Proof.* For the first part, since  $\mathbf{X}_i \in \mathcal{X}_i$ , it admits an orthonormal decomposition  $Q\Lambda Q^\dagger$  such that  $QQ^\dagger = Q^\dagger Q = \mathbf{I}$  and  $\Lambda = \text{diag}(\lambda_1, \dots, \lambda_{d_i})$  with  $\sum_{j=1}^{d_i} \lambda_j = 1$ , and  $\lambda_j \geq 0$  for all  $j$ . Hence

$$\|\mathbf{X}_i\|_F^2 = \text{tr}[\mathbf{X}_i^\dagger \mathbf{X}_i] = \text{tr}[Q\Lambda Q^\dagger Q\Lambda Q^\dagger] = \text{tr}[Q\Lambda^2 Q^\dagger] = \sum_{j=1}^{d_i} \lambda_j^2 \leq \sum_{j=1}^{d_i} \lambda_j = 1 \quad (\text{A.6})$$

where the last inequality holds, since  $0 \leq \lambda_j \leq 1$ , and the result follows.

513 For the second part, letting  $\mathbf{X} = (\mathbf{X}_1, \dots, \mathbf{X}_N)$  and  $\mathbf{X}' = (\mathbf{X}'_1, \dots, \mathbf{X}'_N)$  be two points in  $\mathcal{X}$ , we have

$$\|\mathbf{X} - \mathbf{X}'\|_F = \sqrt{\sum_{i=1}^N \|\mathbf{X}_i - \mathbf{X}'_i\|_F^2} \leq \sqrt{\sum_{i=1}^N (2\|\mathbf{X}_i\|_F^2 + 2\|\mathbf{X}'_i\|_F^2)} \leq 2\sqrt{N} \quad (\text{A.7})$$

514 and since the equality is attained, we get the result.  $\blacksquare$

515 Our next result concerns the *quantum relative entropy*

$$D(\mathbf{P}, \mathbf{X}) = \sum_{i=1}^N D_i(\mathbf{P}_i, \mathbf{X}_i) \quad (\text{A.8})$$

516 where  $\mathbf{P} = (\mathbf{P}_1, \dots, \mathbf{P}_N) \in \mathcal{X}$  and  $\mathbf{X} = (\mathbf{X}_1, \dots, \mathbf{X}_N) \in \text{ri}(\mathcal{X})$  and

$$D_i(\mathbf{P}_i, \mathbf{X}_i) := \text{tr}[\mathbf{P}_i(\log \mathbf{P}_i - \log \mathbf{X}_i)] \quad (\text{A.9})$$

517 The lemma we will require is a semidefinite version of Pinsker's inequality which reads as follows:

518 **Lemma A.2.** *For all  $\mathbf{P} \in \mathcal{X}$  and  $\mathbf{X} \in \text{ri}(\mathcal{X})$  we have*

$$D(\mathbf{P}, \mathbf{X}) \geq \frac{1}{2} \|\mathbf{P} - \mathbf{X}\|_F^2 \quad (\text{A.10})$$

519 *Proof.* Focusing on player  $i \in \mathcal{N}$ , we will show first that

$$D_i(\mathbf{P}_i, \mathbf{X}_i) \geq \frac{1}{2} \|\mathbf{P}_i - \mathbf{X}_i\|_F^2 \quad (\text{A.11})$$

520 for all  $\mathbf{P} = (\mathbf{P}_1, \dots, \mathbf{P}_N) \in \mathcal{X}$  and  $\mathbf{X} = (\mathbf{X}_1, \dots, \mathbf{X}_N) \in \text{ri}(\mathcal{X})$ .

521 To this end, we define the function  $h_i: \mathbb{H}_+^{d_i} \rightarrow \mathbb{R}$  as  $h_i(\mathbf{X}_i) = \text{tr}[\mathbf{X}_i \log \mathbf{X}_i]$ , which is 1-strongly  
522 convex with respect to the nuclear norm  $\|\cdot\|_1$  [48], and since  $\|\mathbf{X}_i\|_1 \geq \|\mathbf{X}_i\|_F$  for all  $\mathbf{X}_i \in \mathcal{X}_i$ , we  
523 readily get that  $h_i$  is 1-strongly convex with respect to the Frobenius norm, as well.

524 Letting  $\nabla h_i(\mathbf{X}_i) = \log \mathbf{X}_i + \mathbf{I}$ , by 1-strong convexity, we have for  $\mathbf{P} = (\mathbf{P}_1, \dots, \mathbf{P}_N) \in \mathcal{X}$  and  
525  $\mathbf{X} = (\mathbf{X}_1, \dots, \mathbf{X}_N) \in \text{ri}(\mathcal{X})$ :

$$\begin{aligned} h_i(\mathbf{P}_i) &\geq h_i(\mathbf{X}_i) + \text{tr}[\nabla h_i(\mathbf{X}_i)(\mathbf{P}_i - \mathbf{X}_i)] + \frac{1}{2} \|\mathbf{P}_i - \mathbf{X}_i\|_F^2 \\ &= \text{tr}[\mathbf{X}_i \log \mathbf{X}_i] + \text{tr}[(\mathbf{P}_i - \mathbf{X}_i) \log \mathbf{X}_i] + \text{tr}[\mathbf{P}_i - \mathbf{X}_i] + \frac{1}{2} \|\mathbf{P}_i - \mathbf{X}_i\|_F^2 \\ &= \text{tr}[\mathbf{P}_i \log \mathbf{X}_i] + \frac{1}{2} \|\mathbf{P}_i - \mathbf{X}_i\|_F^2 \end{aligned} \quad (\text{A.12})$$

526 where we used that  $\text{tr}[\mathbf{P}_i - \mathbf{X}_i] = 0$ . Hence, by reordering, we automatically get that

$$D_i(\mathbf{P}_i, \mathbf{X}_i) \geq \frac{1}{2} \|\mathbf{P}_i - \mathbf{X}_i\|_F^2 \quad (\text{A.13})$$

527 Therefore, we have:

$$D(\mathbf{P}, \mathbf{X}) \geq \frac{1}{2} \sum_{i=1}^N \|\mathbf{P}_i - \mathbf{X}_i\|_F^2 = \frac{1}{2} \|\mathbf{P} - \mathbf{X}\|_F^2 \quad (\text{A.14})$$

528 and the proof is completed.  $\blacksquare$

## 529 B Omitted proofs from Section 4

530 In this appendix, we develop the basic scaffolding required for the estimators (2PE) and (1PE). We  
531 begin with the construction of the estimators' sampling basis, as encoded in Proposition 1, which we  
532 restate below for convenience:

533 **Proposition 1.** *Let  $\mathbf{E}_j$  be defined as  $\mathbf{E}_j = \frac{1}{\sqrt{j(j+1)}}(\Delta_{11} + \dots + \Delta_{jj} - j\Delta_{j+1,j+1})$  for  $j = 1, \dots, d-1$ .*

534 *Then, the set  $\mathcal{E} = \left\{ \{\mathbf{E}_j\}_{j=1}^{d-1}, \{\mathbf{e}_{k\ell}\}_{k<\ell}, \{\tilde{\mathbf{e}}_{k\ell}\}_{k<\ell} \right\}$  is an orthonormal basis of  $\mathcal{Z}$ .*

535 *Proof.* First of all, note that

$$\Delta_{k\ell} \Delta_{mn} = \begin{cases} 0 & \text{if } \ell \neq m \\ \Delta_{kn} & \text{if } \ell = m \end{cases} \quad (\text{B.1})$$



536 **Unit norm.** To begin with, we will show that all elements in  $\mathcal{E}$  have unit norm. Indeed, we have:

537 • For  $j = 1, \dots, d-1$ , we have:

$$\begin{aligned}\|\mathbf{E}_j\|_F^2 &= \text{tr}[\mathbf{E}_j^\dagger \mathbf{E}_j] = \frac{1}{j(j+1)} \text{tr} \left[ \left( \sum_{k=1}^j \Delta_{kk} - j\Delta_{(j+1)(j+1)} \right) \left( \sum_{k=1}^j \Delta_{kk} - j\Delta_{(j+1)(j+1)} \right) \right] \\ &= \frac{1}{j(j+1)} \text{tr} \left[ \left( \sum_{k=1}^j \Delta_{kk} + j^2\Delta_{(j+1)(j+1)} \right) \right] = \frac{1}{j(j+1)} (j + j^2) = 1\end{aligned}\quad (\text{B.2})$$

538 • For  $k < \ell$ , we have:

$$\begin{aligned}\|\mathbf{e}_{k\ell}\|_F^2 &= \text{tr}[\mathbf{e}_{k\ell}^\dagger \mathbf{e}_{k\ell}] = \text{tr} \left[ \left( \frac{1}{\sqrt{2}}\Delta_{\ell k} + \frac{1}{\sqrt{2}}\Delta_{k\ell} \right) \left( \frac{1}{\sqrt{2}}\Delta_{k\ell} + \frac{1}{\sqrt{2}}\Delta_{\ell k} \right) \right] \\ &= \text{tr} \left[ \frac{1}{2}\Delta_{kk} + \frac{1}{2}\Delta_{\ell\ell} \right] = \frac{1}{2} + \frac{1}{2} = 1\end{aligned}\quad (\text{B.3})$$

539 • For  $k < \ell$ , we also have:

$$\begin{aligned}\|\tilde{\mathbf{e}}_{k\ell}\|_F^2 &= \text{tr}[\tilde{\mathbf{e}}_{k\ell}^\dagger \tilde{\mathbf{e}}_{k\ell}] = \text{tr} \left[ \left( -\frac{i}{\sqrt{2}}\Delta_{\ell k} + \frac{i}{\sqrt{2}}\Delta_{k\ell} \right) \left( \frac{i}{\sqrt{2}}\Delta_{k\ell} - \frac{i}{\sqrt{2}}\Delta_{\ell k} \right) \right] \\ &= \text{tr} \left[ \frac{1}{2}\Delta_{kk} + \frac{1}{2}\Delta_{\ell\ell} \right] = \frac{1}{2} + \frac{1}{2} = 1\end{aligned}\quad (\text{B.4})$$

540 **Orthogonality.** Now, we will show that any two elements of  $\mathcal{E}$  are orthogonal to each other.

541 • For  $m < n$ , we have:

$$\begin{aligned}\text{tr}[\mathbf{E}_m^\dagger \mathbf{E}_n] &= \frac{1}{\sqrt{m(m+1)}\sqrt{n(n+1)}} \text{tr} \left[ \left( \sum_{k=1}^m \Delta_{kk} - m\Delta_{(m+1)(m+1)} \right) \left( \sum_{k=1}^n \Delta_{kk} - n\Delta_{(n+1)(n+1)} \right) \right] \\ &= \frac{1}{\sqrt{m(m+1)}\sqrt{n(n+1)}} \text{tr} \left[ \left( \sum_{k=1}^m \Delta_{kk} - m\Delta_{(m+1)(m+1)} \right) \right] \\ &= \frac{1}{\sqrt{m(m+1)}\sqrt{n(n+1)}} (m - m) = 0\end{aligned}\quad (\text{B.5})$$

542 • For  $k < \ell$ , we have:

$$\begin{aligned}\text{tr}[\mathbf{e}_{k\ell}^\dagger \tilde{\mathbf{e}}_{k\ell}] &= \text{tr} \left[ \left( \frac{1}{\sqrt{2}}\Delta_{\ell k} + \frac{1}{\sqrt{2}}\Delta_{k\ell} \right) \left( \frac{i}{\sqrt{2}}\Delta_{k\ell} - \frac{i}{\sqrt{2}}\Delta_{\ell k} \right) \right] \\ &= \text{tr} \left[ \frac{i}{2}\Delta_{\ell\ell} - \frac{i}{2}\Delta_{kk} \right] = \frac{i}{2} - \frac{i}{2} = 0\end{aligned}\quad (\text{B.6})$$

543 • For  $(k, \ell) \neq (m, n)$  with  $k < \ell$  and  $m < n$ , we have:

$$\text{tr}[\mathbf{e}_{k\ell}^\dagger \mathbf{e}_{mn}] = \text{tr}[\mathbf{e}_{k\ell}^\dagger \tilde{\mathbf{e}}_{mn}] = \text{tr}[\tilde{\mathbf{e}}_{k\ell}^\dagger \tilde{\mathbf{e}}_{mn}] = 0\quad (\text{B.7})$$

544 since all the nonzero terms in  $\mathbf{e}_{k\ell}^\dagger \mathbf{e}_{mn}$ ,  $\mathbf{e}_{k\ell}^\dagger \tilde{\mathbf{e}}_{mn}$  and  $\tilde{\mathbf{e}}_{k\ell}^\dagger \tilde{\mathbf{e}}_{mn}$  are of the form  $c \cdot \Delta_{\alpha\beta}$  for some  $c \in \mathbb{C}$ ,  
545 and  $\alpha, \beta \in \{k, \ell, m, n\}$  with  $\alpha \neq \beta$ . Thus,  $\text{tr}[c \cdot \Delta_{\alpha\beta}] = 0$ , since all the diagonal elements are equal  
546 to 0. Note that it is not possible to have  $\alpha = \beta$  because this would imply that  $(k, \ell) = (m, n)$ .

547 • For  $k < \ell$  and  $j = 1, \dots, d-1$ , we have:

$$\text{tr}[\mathbf{e}_{k\ell}^\dagger \mathbf{E}_j] = \text{tr}[\tilde{\mathbf{e}}_{k\ell}^\dagger \mathbf{E}_j] = 0\quad (\text{B.8})$$

548 since the non-zero terms of both  $\mathbf{e}_{k\ell}^\dagger \mathbf{E}_j$  and  $\tilde{\mathbf{e}}_{k\ell}^\dagger \mathbf{E}_j$  are of the form  $\Delta_{kn}, \Delta_{\ell m}$  for  $k \neq n$  and  $\ell \neq m$ .

549 We thus conclude that any two elements of  $\mathcal{E}$  are orthogonal.

550 Finally, it is clear  $\mathcal{E} \subseteq \text{aff}(\mathcal{X}_0)$ , since  $\mathcal{E} \subseteq \mathbb{H}^d$  and  $\text{tr}[\mathbf{e}_{k\ell}] = \text{tr}[\tilde{\mathbf{e}}_{k\ell}] = \text{tr}[\mathbf{E}_j] = 0$ , for  $k < \ell$   
 551 and  $j = 1, \dots, d-1$ . Therefore, the elements in  $\mathcal{E}$  form an orthonormal basis of  $\text{aff}(\mathcal{X}_0)$  and  
 552  $\dim(\text{aff}(\mathcal{X}_0)) = d^2 - 1$ . ■

553 We now proceed with the construction of the precise “safety net” that guarantees that the sampling  
 554 perturbation of the gradient estimator remains within the problem’s feasible region. Again, for  
 555 convenience, we restate the relevant result below:

556 **Proposition 2.** Let  $\mathbf{R} = \frac{1}{d} \sum_{j=1}^d \Delta_{jj}$ . Then, for  $r = \min\left\{\frac{1}{\sqrt{d(d-1)}}, \frac{\sqrt{2}}{d}\right\}$ , it holds that  $\mathbf{R} + r\mathbf{Z} \in \mathcal{X}$  for  
 557 any direction  $\mathbf{Z} \in \mathcal{E}^\pm$ .

558 *Proof.* To begin with, it is clear that  $\mathbf{R} \in \mathbb{H}^d$  and  $\text{tr}[\mathbf{R}] = \sum_{j=1}^d 1/d = 1$ . Moreover, for any  
 559  $u \in \mathbb{C}^d \setminus \{0\}$ , we have:

$$u^\dagger \mathbf{R} u = \frac{1}{d} \sum_{j=1}^d |u_j|^2 > 0 \quad (\text{B.9})$$

560 where  $|u_j|$  is the modulus of the complex number  $u_j \in \mathbb{C}$ . Therefore,  $\mathbf{R}$  is positive definite, i.e., lies  
 561 in  $\text{ri}(\mathcal{X})$ .

562 Now, we need to find  $r > 0$  such that

$$\mathbf{R} + r\mathbf{Z} \in \mathcal{X} \quad (\text{B.10})$$

563 for any  $\mathbf{Z} \in \mathcal{E}^\pm$ .

564 It is clear that for any  $\mathbf{Z} \in \mathcal{E}^\pm$ , we have  $\text{tr}[\mathbf{R} + r\mathbf{Z}] = \text{tr}[\mathbf{R}] = 1$ , since  $\text{tr}[\mathbf{Z}] = 0$ . Hence, it remains to  
 565 consider the positive semi-definite constraint. For this, we will use the following identities, for  $k < \ell$ :

$$u^\dagger (\Delta_{k\ell} + \Delta_{\ell k}) u = \bar{u}_k u_\ell + \bar{u}_\ell u_k = 2\text{Re}(\bar{u}_k u_\ell) \quad (\text{B.11})$$

566 and

$$u^\dagger (i\Delta_{k\ell} - i\Delta_{\ell k}) u = i(\bar{u}_k u_\ell - \bar{u}_\ell u_k) = -2\text{Im}(\bar{u}_k u_\ell) \quad (\text{B.12})$$

567 • For  $\mathbf{Z} = \frac{1}{\sqrt{2}}(\Delta_{k\ell} + \Delta_{\ell k})$  and  $u \in \mathbb{C}^d \setminus \{0\}$ , and using (B.11), we have:

$$\begin{aligned} u^\dagger (\mathbf{R} + r\mathbf{Z}) u &= \frac{1}{d} \sum_{j=1}^d |u_j|^2 + \frac{r}{\sqrt{2}} 2\text{Re}(\bar{u}_k u_\ell) \\ &= \frac{1}{d} \sum_{j \neq k, \ell} |u_j|^2 + \frac{1}{d} \left( |u_k|^2 + |u_\ell|^2 + \frac{rd}{\sqrt{2}} 2\text{Re}(\bar{u}_k u_\ell) \right) \end{aligned} \quad (\text{B.13})$$

568 If  $\text{Re}(\bar{u}_k u_\ell) > 0$ , we get that  $u^\dagger (\mathbf{R} + r\mathbf{Z}) u > 0$ , while if  $\text{Re}(\bar{u}_k u_\ell) \leq 0$  and  $r \leq \sqrt{2}/d$ :

$$u^\dagger (\mathbf{R} + r\mathbf{Z}) u \geq \frac{1}{d} \sum_{j \neq k, \ell} |u_j|^2 + \frac{1}{d} |u_k + u_\ell|^2 \geq 0 \quad (\text{B.14})$$

569 Hence, for  $r \leq \sqrt{2}/d$ , and  $\mathbf{Z} = \frac{1}{\sqrt{2}}(\Delta_{k\ell} + \Delta_{\ell k})$ , we have that  $u^\dagger (\mathbf{R} + r\mathbf{Z}) u \geq 0$  for all  $u \in \mathbb{C}^d$ .

570 • For  $\mathbf{Z} = -\frac{1}{\sqrt{2}}(\Delta_{k\ell} + \Delta_{\ell k})$ , we have

$$\begin{aligned} u^\dagger (\mathbf{R} + r\mathbf{Z}) u &= \frac{1}{d} \sum_{j=1}^d |u_j|^2 - \frac{r}{\sqrt{2}} 2\text{Re}(\bar{u}_k u_\ell) \\ &= \frac{1}{d} \sum_{j \neq k, \ell} |u_j|^2 + \frac{1}{d} \left( |u_k|^2 + |u_\ell|^2 - \frac{rd}{\sqrt{2}} 2\text{Re}(\bar{u}_k u_\ell) \right) \end{aligned} \quad (\text{B.15})$$

571 If  $\text{Re}(\bar{u}_k u_\ell) < 0$ , we get that  $u^\dagger (\mathbf{R} + r\mathbf{Z}) u > 0$ , while if  $\text{Re}(\bar{u}_k u_\ell) \geq 0$  and  $r \leq \sqrt{2}/d$ :

$$u^\dagger (\mathbf{R} + r\mathbf{Z}) u \geq \frac{1}{d} \sum_{j \neq k, \ell} |u_j|^2 + \frac{1}{d} |u_k - u_\ell|^2 \geq 0 \quad (\text{B.16})$$

572 Hence, for  $r \leq \sqrt{2}/d$ , and  $\mathbf{Z} = -\frac{1}{\sqrt{2}}(\Delta_{k\ell} + \Delta_{\ell k})$ , we have that  $u^\dagger (\mathbf{R} + r\mathbf{Z}) u \geq 0$  for all  $u \in \mathbb{C}^d$ .

573 • For  $\mathbf{Z} = \frac{i}{\sqrt{2}}(\Delta_{k\ell} - \Delta_{\ell k})$  and  $u \in \mathbb{C}^d \setminus \{0\}$ , and using (B.11), we have:

$$\begin{aligned} u^\dagger(\mathbf{R} + r\mathbf{Z})u &= \frac{1}{d} \sum_{j=1}^d |u_j|^2 - \frac{r}{\sqrt{2}} 2\text{Im}(\bar{u}_k u_\ell) \\ &= \frac{1}{d} \sum_{j \neq k, \ell} |u_j|^2 + \frac{1}{d} \left( |u_k|^2 + |u_\ell|^2 - \frac{rd}{\sqrt{2}} 2\text{Im}(\bar{u}_k u_\ell) \right) \end{aligned} \quad (\text{B.17})$$

574 If  $\text{Im}(\bar{u}_k u_\ell) < 0$ , we get that  $u^\dagger(\mathbf{R} + r\mathbf{Z})u > 0$ , while if  $\text{Im}(\bar{u}_k u_\ell) \geq 0$  and  $r \leq \sqrt{2}/d$ :

$$u^\dagger(\mathbf{R} + r\mathbf{Z})u \geq \frac{1}{d} \sum_{j \neq k, \ell} |u_j|^2 + \frac{1}{d} |u_k + i u_\ell|^2 \geq 0 \quad (\text{B.18})$$

575 Hence, for  $r \leq \sqrt{2}/2d$ , and  $\mathbf{Z} = \frac{i}{\sqrt{2}}(\Delta_{k\ell} - \Delta_{\ell k})$ , we have that  $u^\dagger(\mathbf{R} + r\mathbf{Z})u \geq 0$  for all  $u \in \mathbb{C}^d$ .

576 • For  $\mathbf{Z} = -\frac{i}{\sqrt{2}}(\Delta_{k\ell} - \Delta_{\ell k})$  and  $u \in \mathbb{C}^d \setminus \{0\}$ , and using (B.11), we have:

$$\begin{aligned} u^\dagger(\mathbf{R} + r\mathbf{Z})u &= \frac{1}{d} \sum_{j=1}^d |u_j|^2 + \frac{r}{\sqrt{2}} 2\text{Im}(\bar{u}_k u_\ell) \\ &= \frac{1}{d} \sum_{j \neq k, \ell} |u_j|^2 + \frac{1}{d} \left( |u_k|^2 + |u_\ell|^2 + \frac{rd}{\sqrt{2}} 2\text{Im}(\bar{u}_k u_\ell) \right) \end{aligned} \quad (\text{B.19})$$

577 If  $\text{Im}(\bar{u}_k u_\ell) > 0$ , we get that  $u^\dagger(\mathbf{R} + r\mathbf{Z})u > 0$ , while if  $\text{Im}(\bar{u}_k u_\ell) \leq 0$  and  $r \leq \sqrt{2}/d$ :

$$u^\dagger(\mathbf{R} + r\mathbf{Z})u \geq \frac{1}{d} \sum_{j \neq k, \ell} |u_j|^2 + \frac{1}{d} |u_k - i u_\ell|^2 \quad (\text{B.20})$$

578 Hence, for  $r \leq \sqrt{2}/2d$ , and  $\mathbf{Z} = -\frac{i}{\sqrt{2}}(\Delta_{k\ell} - \Delta_{\ell k})$ , we have that  $u^\dagger(\mathbf{R} + r\mathbf{Z})u \geq 0$  for all  $u \in \mathbb{C}^d$ .

579 • For  $\mathbf{Z} = \frac{1}{\sqrt{j(j+1)}}(\Delta_{11} + \dots + \Delta_{jj} - j\Delta_{(j+1)(j+1)})$ , we have:

$$\begin{aligned} u^\dagger(\mathbf{R} + r\mathbf{Z})u &= \frac{1}{d} \sum_{k=1}^d |u_k|^2 + \frac{r}{\sqrt{j(j+1)}} \sum_{k=1}^j |u_k|^2 - \frac{jr}{\sqrt{j(j+1)}} |u_{j+1}|^2 \\ &= \frac{1}{d} \sum_{k \neq j+1} |u_k|^2 + \frac{r}{\sqrt{j(j+1)}} \sum_{k=1}^j |u_k|^2 + \left( \frac{1}{d} - \frac{jr}{\sqrt{j(j+1)}} \right) |u_{j+1}|^2 \end{aligned} \quad (\text{B.21})$$

580 Thus, we need to ensure that

$$\frac{1}{d} - \frac{jr}{\sqrt{j(j+1)}} \geq 0 \quad (\text{B.22})$$

581 for all  $j = 1, \dots, d-1$ . Because the function  $x \mapsto \sqrt{x(x+1)}/x$  is decreasing, it obtains the smallest  
582 value from  $x = d-1$ . Therefore, for  $r \leq 1/\sqrt{d(d-1)}$ , we readily obtain that  $u^\dagger(\mathbf{R} + r\mathbf{Z})u \geq 0$  for  
583 all  $u \in \mathbb{C}^d$ .

584 • For  $\mathbf{Z} = -\frac{1}{\sqrt{j(j+1)}}(\Delta_{11} + \dots + \Delta_{jj} - j\Delta_{(j+1)(j+1)})$ , we have:

$$\begin{aligned} u^\dagger(\mathbf{R} + r\mathbf{Z})u &= \frac{1}{d} \sum_{k=1}^d |u_k|^2 - \frac{r}{\sqrt{j(j+1)}} \sum_{k=1}^j |u_k|^2 + \frac{jr}{\sqrt{j(j+1)}} |u_{j+1}|^2 \\ &= \left( \frac{1}{d} - \frac{r}{\sqrt{j(j+1)}} \right) \sum_{k=1}^j |u_k|^2 + \frac{1}{d} \sum_{k=j+1}^d |u_k|^2 + \frac{jr}{\sqrt{j(j+1)}} |u_{j+1}|^2 \end{aligned} \quad (\text{B.23})$$

585 Thus, we need to ensure that

$$\frac{1}{d} - \frac{r}{\sqrt{j(j+1)}} \geq 0 \quad (\text{B.24})$$

for all  $j = 1, \dots, d - 1$ . Because it holds that

$$\frac{1}{d} - \frac{r}{\sqrt{j(j+1)}} \geq \frac{1}{d} - \frac{jr}{\sqrt{j(j+1)}} \quad (\text{B.25})$$

we obtain the inequality for free by the previous case, i.e., for  $r \leq 1/\sqrt{d(d-1)}$ .

Therefore, for

$$r = \min \left\{ \frac{1}{\sqrt{d(d-1)}}, \frac{\sqrt{2}}{d} \right\} \quad (\text{B.26})$$

we readily obtain that  $u^\dagger(\mathbf{R} + r\mathbf{Z})u \geq 0$  for all  $u \in \mathbb{C}^d$ , and our proof is complete.  $\blacksquare$

## C Omitted proofs from Section 5

Our aim in this appendix will be to prove the basic guarantees of (3MW) with payoff-based feedback. The structure of this appendix shadows that of Section 5 and is broken into two parts, depending on the specific type of input available to the players. The only point of departure is the energy inequality of Lemma 1, which is common to both algorithms, and which we restate and prove below:

**Lemma 1.** Fix some  $\mathbf{P} \in \mathcal{X}$ , and let  $\mathbf{X}_t, \mathbf{X}_{t+1}$  be two successive iterates of (3MW), without any assumptions for the input sequence  $\hat{\mathbf{V}}_t$ . We then have

$$D(\mathbf{P}, \mathbf{X}_{t+1}) \leq D(\mathbf{P}, \mathbf{X}_t) + \gamma_t \text{tr}[\hat{\mathbf{V}}_t(\mathbf{X}_t - \mathbf{P})] + \frac{\gamma_t^2}{2} \|\hat{\mathbf{V}}_t\|_F^2. \quad (17)$$

*Proof.* By the definition of  $D$ , it is easy to see that for  $\mathbf{P} \in \mathcal{X}$  and  $\mathbf{X}, \mathbf{X}' \in \text{ri}(\mathcal{X})$ , we have

$$D(\mathbf{P}, \mathbf{X}') = D(\mathbf{P}, \mathbf{X}) + D(\mathbf{X}, \mathbf{X}') + \text{tr}[(\log \mathbf{X}' - \log \mathbf{X})(\mathbf{X} - \mathbf{P})] \quad (\text{C.1})$$

Since  $\nabla h(\mathbf{X}) = \log \mathbf{X} + \mathbf{I}$ , the above equality can be written as:

$$D(\mathbf{P}, \mathbf{X}') = D(\mathbf{P}, \mathbf{X}) + D(\mathbf{X}, \mathbf{X}') + \text{tr}[(\nabla h(\mathbf{X}') - \nabla h(\mathbf{X}))(\mathbf{X} - \mathbf{P})] \quad (\text{C.2})$$

Setting  $\mathbf{X}$  as  $\mathbf{X}_{t+1}$ , and  $\mathbf{X}'$  as  $\mathbf{X}_t$ , and invoking the easily verifiable fact that  $\nabla h(\mathbf{X}_{t+1}) - \nabla h(\mathbf{X}_t) = \gamma_t \hat{\mathbf{V}}_t$ , we get

$$D(\mathbf{P}, \mathbf{X}_t) = D(\mathbf{P}, \mathbf{X}_{t+1}) + D(\mathbf{X}_{t+1}, \mathbf{X}_t) - \gamma_t \text{tr}[\hat{\mathbf{V}}_t(\mathbf{X}_{t+1} - \mathbf{P})] \quad (\text{C.3})$$

and hence:

$$\begin{aligned} D(\mathbf{P}, \mathbf{X}_{t+1}) &= D(\mathbf{P}, \mathbf{X}_t) - D(\mathbf{X}_{t+1}, \mathbf{X}_t) + \gamma_t \text{tr}[\hat{\mathbf{V}}_t(\mathbf{X}_{t+1} - \mathbf{P})] \\ &\leq D(\mathbf{P}, \mathbf{X}_t) - \frac{1}{2} \|\mathbf{X}_{t+1} - \mathbf{X}_t\|_F^2 + \gamma_t \text{tr}[\hat{\mathbf{V}}_t(\mathbf{X}_{t+1} - \mathbf{P})] \\ &= D(\mathbf{P}, \mathbf{X}_t) - \frac{1}{2} \|\mathbf{X}_{t+1} - \mathbf{X}_t\|_F^2 + \gamma_t \text{tr}[\hat{\mathbf{V}}_t(\mathbf{X}_t - \mathbf{P})] + \gamma_t \text{tr}[\hat{\mathbf{V}}_t(\mathbf{X}_{t+1} - \mathbf{X}_t)] \\ &\leq D(\mathbf{P}, \mathbf{X}_t) + \gamma_t \text{tr}[\hat{\mathbf{V}}_t(\mathbf{X}_t - \mathbf{P})] + \frac{\gamma_t^2}{2} \|\hat{\mathbf{V}}_t\|_F^2 \end{aligned} \quad (\text{C.4})$$

where the first inequality holds due to Lemma A.2, and in the last step we used that  $\|\cdot\|_F$  is an inner-product norm on  $\mathcal{X}$ , so

$$\frac{1}{2} \|\mathbf{X}_{t+1} - \mathbf{X}_t\|_F^2 + \frac{\gamma_t^2}{2} \|\hat{\mathbf{V}}_t\|_F^2 \geq \gamma_t \text{tr}[\hat{\mathbf{V}}_t(\mathbf{X}_{t+1} - \mathbf{X}_t)] \quad (\text{C.5})$$

This concludes our proof.  $\blacksquare$

With this template inequality in hand, we proceed with the guarantees of (3MW) in the next sections.

606 **C.1. Learning with mixed payoff observations.** We begin with the statistics of the 2-point sampler  
 607 (2PE), which we restate below:

608 **Proposition 3.** *The estimator (2PE) enjoys the conditional bounds*

$$(i) \quad \|\mathbb{E}[\hat{\mathbf{V}}_t | \mathcal{F}_t] - \mathbf{V}(\mathbf{X}_t)\|_F \leq 4DL\delta_t \quad \text{and} \quad (ii) \quad \mathbb{E}[\|\hat{\mathbf{V}}_t\|_F^2 | \mathcal{F}_t] \leq 16D^2G^2 \quad (18)$$

609 *Proof.* We prove each part separately.

610 (i) Let  $\Xi_{i,t}^{(+)}$  and  $\Xi_{i,t}^{(-)}$  be defined for all players  $i \in \{1, 2\}$  as

$$\begin{aligned} \Xi_{i,t}^{(+)} &= (\mathbf{X}_{i,t}^{(\delta)} + s_{i,t}\delta_t\mathbf{Z}_{i,t}) - \mathbf{X}_{i,t} \\ &= s_{i,t}\delta_t\mathbf{Z}_{i,t} + \frac{\delta_t}{r_i}(\mathbf{R}_i - \mathbf{X}_{i,t}) = \delta_t \left[ s_{i,t}\mathbf{Z}_{i,t} + \frac{1}{r_i}(\mathbf{R}_i - \mathbf{X}_{i,t}) \right] \end{aligned} \quad (C.6)$$

611 and

$$\Xi_{i,t}^{(-)} = (\mathbf{X}_{i,t}^{(\delta)} - s_{i,t}\delta_t\mathbf{Z}_{i,t}) - \mathbf{X}_{i,t} = \delta_t \left[ -s_{i,t}\mathbf{Z}_{i,t} + \frac{1}{r_i}(\mathbf{R}_i - \mathbf{X}_{i,t}) \right] \quad (C.7)$$

612 Taking a first-order Taylor expansion of  $u_i$ , we obtain:

$$u_i(\mathbf{X}_t^{(\delta)} + s_{i,t}\delta_t\mathbf{Z}_{i,t}) = u_i(\mathbf{X}_t) + \sum_{j \in \mathcal{N}} \text{tr} \left[ \nabla_{\mathbf{X}_j^T} u_i(\mathbf{X}_t)^\dagger \Xi_{j,t}^{(+)} \right] + R_2(\Xi_t^{(+)}) \quad (C.8a)$$

613 and

$$u_i(\mathbf{X}_t^{(\delta)} - s_{i,t}\delta_t\mathbf{Z}_{i,t}) = u_i(\mathbf{X}_t) + \sum_{j \in \mathcal{N}} \text{tr} \left[ \nabla_{\mathbf{X}_j^T} u_i(\mathbf{X}_t)^\dagger \Xi_{j,t}^{(-)} \right] + R_2(\Xi_t^{(-)}) \quad (C.8b)$$

614 where  $R_2(\cdot)$  is the 2nd order Taylor remainder. Now, for  $j \neq i \in \mathcal{N}$ , since  $s_{i,t}$  is zero-mean  
 615 and independent of any other process:

$$\mathbb{E} \left[ \text{tr} \left[ \nabla_{\mathbf{X}_j^T} u_i(\mathbf{X}_t)^\dagger (\Xi_{j,t}^{(+)} - \Xi_{j,t}^{(-)}) \right] s_{i,t} \mathbf{Z}_{i,t} \mid \mathcal{F}_t \right] = 0 \quad (C.9)$$

616 and using that  $\Xi_{i,t}^{(+)} - \Xi_{i,t}^{(-)} = 2s_{i,t}\delta_t\mathbf{Z}_{i,t}$ , we have:

$$\begin{aligned} \mathbb{E} \left[ \text{tr} \left[ \nabla_{\mathbf{X}_i^T} u_i(\mathbf{X}_t)^\dagger (\Xi_{i,t}^{(+)} - \Xi_{i,t}^{(-)}) \right] s_{i,t} \mathbf{Z}_{i,t} \mid \mathcal{F}_t \right] &= \mathbb{E} \left[ \text{tr} \left[ \mathbf{V}_i(\mathbf{X}_t)^\dagger (2s_{i,t}\delta_t\mathbf{Z}_{i,t}) \right] s_{i,t} \mathbf{Z}_{i,t} \mid \mathcal{F}_t \right] \\ &= 2\delta_t \mathbb{E} \left[ \text{tr} \left[ \mathbf{V}_i(\mathbf{X}_t)^\dagger \mathbf{Z}_{i,t} \right] s_{i,t}^2 \mathbf{Z}_{i,t} \mid \mathcal{F}_t \right] \\ &= 2\delta_t \mathbb{E} \left[ \text{tr} \left[ \mathbf{V}_i(\mathbf{X}_t)^\dagger \mathbf{Z}_{i,t} \right] \mathbf{Z}_{i,t} \mid \mathcal{F}_t \right] \\ &= \frac{2\delta_t}{D_i} \sum_{W \in \mathcal{E}_i} \text{tr} \left[ \mathbf{V}_i(\mathbf{X}_t)^\dagger W \right] W \\ &= \frac{2\delta_t}{D_i} \text{proj}_{\mathcal{E}_i}(\mathbf{V}_i(\mathbf{X}_t)) = \frac{2\delta_t}{D_i} \mathbf{V}_i(\mathbf{X}_t) \end{aligned} \quad (C.10)$$

617 where in the last step, with a slight abuse of notation, we identify  $\text{proj}_{\mathcal{E}_i}(\mathbf{V}_i(\mathbf{X}_t))$  with  $\mathbf{V}_i(\mathbf{X}_t)$ .  
 618 The reason for this is that we apply the differential operator  $\mathbf{V}_i(\mathbf{X}_t)$  only on elements of  $\mathcal{X}_i$ ,  
 619 and thus, we can ignore the component of  $\mathbf{V}_i(\mathbf{X}_t)$  that is orthogonal to  $\text{span}(\mathcal{E}_i)$ .

620 Moreover, we have that

$$|R_2(\Xi_t^{(+)})| \leq \frac{L}{2} \|\Xi_t^{(+)}\|_F^2 \leq L\delta_t^2 \quad (C.11)$$

621 and similarly, we get the same bound for  $|R_2(\Xi_t^{(-)})|$ . Therefore, in light of the above, we obtain  
 622 the bound:

$$\|\mathbb{E}[\hat{\mathbf{V}}_{i,t} | \mathcal{F}_t] - \mathbf{V}_i(\mathbf{X}_t)\|_F \leq \frac{1}{2} D_i L \delta_t \quad (C.12a)$$

623 and, hence

$$\|\mathbb{E}[\hat{\mathbf{V}}_t | \mathcal{F}_t] - \mathbf{V}(\mathbf{X}_t)\|_F \leq \frac{\sqrt{2}}{2} D L \delta_t \quad (C.12b)$$



624 (ii) By the definition of  $\hat{\mathbf{V}}_{i,t}$ , we have:

$$\begin{aligned}\|\hat{\mathbf{V}}_{i,t}\|_F &= \frac{D_i}{2\delta_t} \left| u_i(\mathbf{X}_t^{(\delta)} + s_t \delta_t \mathbf{Z}_t) - u_i(\mathbf{X}_t^{(\delta)} - s_t \delta_t \mathbf{Z}_t) \right| \|s_{i,t} \mathbf{Z}_{i,t}\|_F \\ &\leq \frac{D_i}{2\delta_t} G \|2s_t \delta_t \mathbf{Z}_t\|_F \leq \sqrt{2} D_i G\end{aligned}\quad (\text{C.13})$$

625 and therefore, we readily obtain that:

$$\mathbb{E}[\|\hat{\mathbf{V}}_{i,t}\|_F^2 \mid \mathcal{F}_t] \leq 2D_i^2 G^2 \quad (\text{C.14})$$

626 so

$$\mathbb{E}[\|\hat{\mathbf{V}}_t\|_F^2 \mid \mathcal{F}_t] \leq 4D^2 G^2 \quad (\text{C.15})$$

627 and our proof is complete.  $\blacksquare$

628 With all these technical elements in place, we are finally in a position to prove our convergence  
629 result for (3MW) run with 2-point gradient estimators. As before, we restate our result below for  
630 convenience:

631 **Theorem 2.** *Suppose that each player of a 2-player zero-sum game  $\mathcal{Q}$  follows (3MW) for  $T$  epochs  
632 with learning rate  $\gamma$ , sampling radius  $\delta$ , and gradient estimates provided by (2PE). Then the players'  
633 empirical frequency of play enjoys the duality gap guarantee*

$$\mathbb{E}[\text{Gap}_{\mathcal{L}}(\bar{\mathbf{X}}_T)] \leq \frac{H}{\gamma T} + 8D^2 G^2 \gamma + 16DL\delta \quad (14)$$

634 where  $H = \log(d_1 d_2)$ . In particular, for  $\gamma = (DG)^{-1} \sqrt{H/(8T)}$  and  $\delta = (G/L) \sqrt{H/(8T)}$ , the players  
635 enjoy the equilibrium convergence guarantee

$$\mathbb{E}[\text{Gap}_{\mathcal{L}}(\bar{\mathbf{X}}_T)] \leq 8DG \sqrt{2H/T}. \quad (15)$$

636 *Proof.* Let  $\mathbf{X}^* \in \mathcal{X}$  be a NE point. By Lemma 1 for  $\mathbf{P} = \mathbf{X}^*$ , and setting  $F_t := D(\mathbf{X}^*, \mathbf{X}_t)$  for all  
637  $t = 1, 2, \dots$ , we have

$$F_{t+1} \leq F_t + \gamma_t \text{tr}[\hat{\mathbf{V}}_t^\dagger (\mathbf{X}_t - \mathbf{X}^*)] + \frac{\gamma_t^2}{2} \|\hat{\mathbf{V}}_t\|_F^2 \quad (\text{C.16})$$

638 or, equivalently

$$\text{tr}[\hat{\mathbf{V}}_t^\dagger (\mathbf{X}^* - \mathbf{X}_t)] \leq \frac{1}{\gamma_t} (F_t - F_{t+1}) + \frac{\gamma_t}{2} \|\hat{\mathbf{V}}_t\|_F^2 \quad (\text{C.17})$$

639 Summing over the whole sequence  $t = 1, \dots, T$ , we get:

$$\sum_{t=1}^T \text{tr}[\hat{\mathbf{V}}_t^\dagger (\mathbf{X}^* - \mathbf{X}_t)] \leq \sum_{t=1}^T \frac{1}{\gamma_t} (F_t - F_{t+1}) + \frac{1}{2} \sum_{t=1}^T \gamma_t \|\hat{\mathbf{V}}_t\|_F^2 \quad (\text{C.18})$$

640 which can be rewritten by setting  $\gamma_0 = \infty$ , as:

$$\sum_{t=1}^T \text{tr}[\hat{\mathbf{V}}_t^\dagger (\mathbf{X}^* - \mathbf{X}_t)] \leq \sum_{t=1}^T F_t \left( \frac{1}{\gamma_t} - \frac{1}{\gamma_{t-1}} \right) + \frac{1}{2} \sum_{t=1}^T \gamma_t \|\hat{\mathbf{V}}_t\|_F^2 \quad (\text{C.19})$$

641 Decomposing  $\hat{\mathbf{V}}_t$  as

$$\hat{\mathbf{V}}_t = \mathbf{V}(\mathbf{X}_t) + b_t + U_t \quad (\text{C.20})$$

642 with

643 (i)  $b_t = \mathbb{E}[\hat{\mathbf{V}}_t \mid \mathcal{F}_t] - \mathbf{V}(\mathbf{X}_t)$

644 (ii)  $U_t = \hat{\mathbf{V}}_t - \mathbb{E}[\hat{\mathbf{V}}_t \mid \mathcal{F}_t]$

equation (D.18) becomes:

$$\begin{aligned}
\sum_{t=1}^T \text{tr}[\mathbf{V}(\mathbf{X}_t)^\dagger (\mathbf{X}^* - \mathbf{X}_t)] &\leq \sum_{t=1}^T F_t \left( \frac{1}{\gamma_t} - \frac{1}{\gamma_{t-1}} \right) + \frac{1}{2} \sum_{t=1}^T \gamma_t \|\hat{\mathbf{V}}_t\|_F^2 \\
&\quad + \sum_{t=1}^T \text{tr}[b_t^\dagger (\mathbf{X}_t - \mathbf{X}^*)] + \sum_{t=1}^T \text{tr}[U_t^\dagger (\mathbf{X}_t - \mathbf{X}^*)] \\
&\leq \sum_{t=1}^T F_t \left( \frac{1}{\gamma_t} - \frac{1}{\gamma_{t-1}} \right) + \frac{1}{2} \sum_{t=1}^T \gamma_t \|\hat{\mathbf{V}}_t\|_F^2 \\
&\quad + 4 \sum_{t=1}^T \|b_t\|_F + \sum_{t=1}^T \text{tr}[U_t^\dagger (\mathbf{X}_t - \mathbf{X}^*)] \tag{C.21}
\end{aligned}$$

The left-hand side (LHS) of (D.20) gives:

$$\begin{aligned}
\sum_{t=1}^T \text{tr}[\mathbf{V}(\mathbf{X}_t)^\dagger (\mathbf{X}^* - \mathbf{X}_t)] &= \sum_{t=1}^T \text{tr}[\mathbf{V}_1(\mathbf{X}_t)^\dagger (\mathbf{X}_1^* - \mathbf{X}_{1,t})] + \sum_{t=1}^T \text{tr}[\mathbf{V}_2(\mathbf{X}_t)^\dagger (\mathbf{X}_2^* - \mathbf{X}_{2,t})] \\
&= \sum_{t=1}^T (u_1(\mathbf{X}_1^*, \mathbf{X}_{2,t}) - u_1(\mathbf{X}_t)) + \sum_{t=1}^T (u_2(\mathbf{X}_{1,t}, \mathbf{X}_2^*) - u_2(\mathbf{X}_t)) \\
&= \sum_{t=1}^T (\mathcal{L}(\mathbf{X}_1^*, \mathbf{X}_{2,t}) - \mathcal{L}(\mathbf{X}_{1,t}, \mathbf{X}_2^*)) \tag{C.22}
\end{aligned}$$

Hence, dividing by  $T$ , we get:

$$\mathcal{L}(\mathbf{X}_1^*, \bar{\mathbf{X}}_{2,T}) - \mathcal{L}(\bar{\mathbf{X}}_{1,T}, \mathbf{X}_2^*) \leq \frac{1}{T} \sum_{t=1}^T \text{tr}[\mathbf{V}(\mathbf{X}_t)^\dagger (\mathbf{X}^* - \mathbf{X}_t)] \tag{C.23}$$

or, equivalently,

$$\begin{aligned}
\text{Gap}_{\mathcal{L}}(\bar{\mathbf{X}}_T) &\leq \frac{1}{T} \sum_{t=1}^T \text{tr}[\mathbf{V}(\mathbf{X}_t)^\dagger (\mathbf{X}^* - \mathbf{X}_t)] \\
&\leq \frac{1}{T} \sum_{t=1}^T F_t \left( \frac{1}{\gamma_t} - \frac{1}{\gamma_{t-1}} \right) + \frac{1}{2T} \sum_{t=1}^T \gamma_t \|\hat{\mathbf{V}}_t\|_F^2 \\
&\quad + \frac{4}{T} \sum_{t=1}^T \|b_t\|_F + \frac{1}{T} \sum_{t=1}^T \text{tr}[U_t^\dagger (\mathbf{X}_t - \mathbf{X}^*)] \tag{C.24}
\end{aligned}$$

Now, we focus on the right-hand side (RHS) of (D.20). Specifically, we have:

$$\mathbb{E}[\text{tr}[U_t^\dagger (\mathbf{X}_t - \mathbf{X}^*)]] = \mathbb{E}[\mathbb{E}[\text{tr}[U_t^\dagger (\mathbf{X}_t - \mathbf{X}^*)] \mid \mathcal{F}_t]] = 0 \tag{C.25}$$

since  $\mathbf{X}_t$  is  $\mathcal{F}_t$ -measurable and  $\mathbb{E}[U_t \mid \mathcal{F}_t] = 0$ .

Moreover, by Proposition 3, we have:

$$\|b_{i,t}\|_F = \|\mathbb{E}[\hat{\mathbf{V}}_{i,t} \mid \mathcal{F}_t] - \mathbf{V}_i(\mathbf{X}_t)\|_F \leq 2D_i L \delta_t \tag{C.26a}$$

and

$$\mathbb{E}[\|\hat{\mathbf{V}}_{i,t}\|_F^2] = \mathbb{E}[\mathbb{E}[\|\hat{\mathbf{V}}_{i,t}\|_F^2 \mid \mathcal{F}_t]] \leq 4D_i^2 G^2 \tag{C.26b}$$

Hence, taking expectation in (D.20), we obtain:

$$\begin{aligned}
\mathbb{E}[\text{Gap}_{\mathcal{L}}(\bar{\mathbf{X}}_T)] &\leq \frac{1}{T} \sum_{t=1}^T \mathbb{E}[F_t] \left( \frac{1}{\gamma_t} - \frac{1}{\gamma_{t-1}} \right) + \frac{1}{2T} \sum_{t=1}^T \gamma_t \mathbb{E}[\|\hat{\mathbf{V}}_t\|_F^2] + \frac{4}{T} \sum_{t=1}^T \mathbb{E}[\|b_t\|_F] \\
&\leq \frac{1}{T} \sum_{t=1}^T \mathbb{E}[F_t] \left( \frac{1}{\gamma_t} - \frac{1}{\gamma_{t-1}} \right) + \frac{8D^2 G^2}{T} \sum_{t=1}^T \gamma_t + \frac{16DL}{T} \sum_{t=1}^T \delta_t \tag{C.27}
\end{aligned}$$

Setting  $\gamma_t = \gamma$  and  $\delta_t = \delta$ , we obtain:

$$\mathbb{E}[\text{Gap}_{\mathcal{L}}(\bar{\mathbf{X}}_T)] \leq \frac{F_1}{\gamma T} + 8D^2G^2\gamma + 16DL\delta \quad (\text{C.28})$$

and finally, noting that

$$F_1 = D(\mathbf{X}^*, \mathbf{X}_1) \leq \log(d_1 d_2) \quad (\text{C.29})$$

we get:

$$\mathbb{E}[\text{Gap}_{\mathcal{L}}(\bar{\mathbf{X}}_T)] \leq \frac{H}{\gamma T} + 8D^2G^2\gamma + 16DL\delta \quad (\text{C.30})$$

for  $H = \log(d_1 d_2)$ . Hence, after tuning  $\gamma$  to optimize this last expression, our result follows by setting  $\gamma = \sqrt{\frac{H}{8TD^2G^2}}$  and  $\delta = \sqrt{\frac{G^2H}{8L^2T}}$ . ■

**C.2. Learning with bandit feedback.** We now proceed with the more arduous task of proving the bona fide, bandit guarantees of (3MW) with 1-point, stochastic, payoff-based feedback. The key difference with our previous analysis lies in the different statistical properties of the 1-point estimator (1PE). The relevant result that we will need is restated below:

**Proposition 4.** *The estimator (1PE) enjoys the conditional bounds*

$$(i) \quad \|\mathbb{E}[\hat{\mathbf{V}}_t | \mathcal{F}_t] - \mathbf{V}(\mathbf{X}_t)\|_F \leq 4DL\delta_t \quad \text{and} \quad (ii) \quad \mathbb{E}[\|\hat{\mathbf{V}}_t\|_F^2 | \mathcal{F}_t] \leq 4D^2B^2/\delta_t^2. \quad (19)$$

*Proof.* We prove each part separately.

(i) Let  $\Xi_{i,t}$  be defined for all players  $i \in \mathcal{N}$ :

$$\Xi_{i,t} = \mathbf{X}_{i,t}^{(\delta)} - \mathbf{X}_{i,t} = \delta_t \mathbf{Z}_{i,t} + \frac{\delta_t}{r_i} (\mathbf{R}_i - \mathbf{X}_{i,t}) = \delta_t \left[ \mathbf{Z}_{i,t} + \frac{1}{r_i} (\mathbf{R}_i - \mathbf{X}_{i,t}) \right] \quad (\text{C.31})$$

Taking a first-order Taylor expansion of  $u_i$ , we obtain:

$$u_i(\mathbf{X}_t^{(\delta)} + \delta_t \mathbf{Z}_t) = u_i(\mathbf{X}_t) + \sum_{j \in \mathcal{N}} \text{tr} \left[ \nabla_{\mathbf{X}_j^\top} u_i(\mathbf{X}_t)^\dagger \Xi_{j,t} \right] + R_2(\Xi_t) \quad (\text{C.32})$$

Since  $\mathbb{E}[U_i(\omega_t) | \mathcal{F}_t, \mathbf{Z}_t] = u(\mathbf{X}_t^{(\delta)} + \delta_t \mathbf{Z}_t)$ , combining it with (D.3), we readily get:

$$\mathbb{E}[\hat{\mathbf{V}}_{i,t} | \mathcal{F}_t, \mathbf{Z}_t] = \frac{D_i}{\delta_t} u_i(\mathbf{X}_t^{(\delta)} + \delta_t \mathbf{Z}_t) \mathbf{Z}_{i,t} \quad (\text{C.33})$$

$$= \frac{D_i}{\delta_t} u_i(\mathbf{X}_t) \mathbf{Z}_{i,t} + \frac{D_i}{\delta_t} \sum_{j \in \mathcal{N}} \text{tr} \left[ \nabla_{\mathbf{X}_j^\top} u_i(\mathbf{X}_t)^\dagger \Xi_{j,t} \right] \mathbf{Z}_{i,t} + \frac{D_i}{\delta_t} R_2(\Xi_t) \mathbf{Z}_{i,t} \quad (\text{C.34})$$

Now, because  $\mathbb{E}[\mathbf{Z}_{i,t} | \mathcal{F}_t] = 0$  and  $\mathbf{Z}_{i,t}$  is sampled independent of any other process, we have:

$$\mathbb{E}[u_i(\mathbf{X}_t) \mathbf{Z}_{i,t} | \mathcal{F}_t] = u_i(\mathbf{X}_t) \mathbb{E}[\mathbf{Z}_{i,t} | \mathcal{F}_t] = 0 \quad (\text{C.35})$$

and for  $j \neq i \in \mathcal{N}$ :

$$\mathbb{E} \left[ \text{tr} \left[ \nabla_{\mathbf{X}_j^\top} u_i(\mathbf{X}_t)^\dagger \Xi_{j,t} \right] \mathbf{Z}_{i,t} \middle| \mathcal{F}_t \right] = 0 \quad (\text{C.36})$$

Therefore, we obtain:

$$\begin{aligned} \mathbb{E} \left[ \sum_{j \in \mathcal{N}} \text{tr} \left[ \nabla_{\mathbf{X}_j^\top} u_i(\mathbf{X}_t)^\dagger \Xi_{j,t} \right] \mathbf{Z}_{i,t} \middle| \mathcal{F}_t \right] &= \mathbb{E}[\text{tr}[\mathbf{V}_i(\mathbf{X}_t)^\dagger \Xi_{i,t}] \mathbf{Z}_{i,t} | \mathcal{F}_t] \\ &= \delta_t \mathbb{E}[\text{tr}[\mathbf{V}_i(\mathbf{X}_t)^\dagger \mathbf{Z}_{i,t}] \mathbf{Z}_{i,t} | \mathcal{F}_t] \\ &= \frac{\delta_t}{D_i} \sum_{\mathbf{W} \in \mathcal{E}_i} \text{tr}[\mathbf{V}_i(\mathbf{X}_t)^\dagger \mathbf{W}] \mathbf{W} \\ &= \frac{\delta_t}{D_i} \text{proj}_{\mathcal{E}_i}(\mathbf{V}_i(\mathbf{X}_t)) = \frac{\delta_t}{D_i} \mathbf{V}_i(\mathbf{X}_t) \end{aligned} \quad (\text{C.37})$$

where in the last step, we identify  $\text{proj}_{\mathcal{E}_t}(\mathbf{V}_i(\mathbf{X}_t))$  with  $\mathbf{V}_i(\mathbf{X}_t)$ , as explained in the proof of Proposition 3. Moreover, we have that

$$|R_2(\Xi_t)| \leq \frac{L}{2} \|\Xi_t\|_F^2 \leq L\delta_t^2 \quad (\text{C.38})$$

In view of the above, we have:

$$\|\mathbb{E}[\hat{\mathbf{V}}_{i,t} | \mathcal{F}_t] - \mathbf{V}_i(\mathbf{X}_t)\|_F = D_i L \delta_t \quad (\text{C.39})$$

and, therefore,

$$\|\mathbb{E}[\hat{\mathbf{V}}_t | \mathcal{F}_t] - \mathbf{V}(\mathbf{X}_t)\|_F = \sqrt{2} D L \delta_t \quad (\text{C.40})$$

(ii) By the definition of  $\hat{\mathbf{V}}_{i,t}$ , we have:

$$\|\hat{\mathbf{V}}_{i,t}\|_F = \frac{D_i}{\delta_t} \left| u_i(\mathbf{X}_t^{(\delta)} + \delta_t \mathbf{Z}_t) \right| \|\mathbf{Z}_{i,t}\|_F \leq \frac{D_i B}{\delta_t} \quad (\text{C.41})$$

and therefore, we readily obtain that:

$$\mathbb{E}[\|\hat{\mathbf{V}}_{i,t}\|_F^2 | \mathcal{F}_t] \leq \frac{D_i^2 B^2}{\delta_t^2} \quad (\text{C.42})$$

We thus obtain

$$\mathbb{E}[\|\hat{\mathbf{V}}_t\|_F^2 | \mathcal{F}_t] \leq \frac{2D^2 B^2}{\delta_t^2} \quad (\text{C.43})$$

and our proof is complete.  $\blacksquare$

The only step missing is the proof of the actual guarantee of (3MW) with bandit feedback. We restate and prove the relevant result below:

**Theorem 3.** *Suppose that each player of a 2-player zero-sum game  $\mathcal{Q}$  follows (3MW) for  $T$  epochs with learning rate  $\gamma$ , sampling radius  $\delta$ , and gradient estimates provided by (1PE). Then the players' empirical frequency of play enjoys the duality gap guarantee*

$$\mathbb{E}[\text{Gap}_{\mathcal{L}}(\bar{\mathbf{X}}_T)] \leq \frac{H}{\gamma T} + \frac{2D^2 B^2 \gamma}{\delta^2} + 16DL\delta \quad (20)$$

where  $H = \log(d_1 d_2)$ . In particular, for  $\gamma = \left(\frac{H}{2T}\right)^{3/4} \frac{1}{2D\sqrt{BL}}$  and  $\delta = \left(\frac{H}{2T}\right)^{1/4} \sqrt{\frac{B}{4L}}$ , the players enjoy the equilibrium convergence guarantee:

$$\mathbb{E}[\text{Gap}_{\mathcal{L}}(\bar{\mathbf{X}}_T)] \leq \frac{2^{3/4} 8H^{1/4} D\sqrt{BL}}{T^{1/4}}. \quad (21)$$

*Proof.* Following the same procedure as in the proof of Theorem 2, we readily obtain:

$$\begin{aligned} \text{Gap}_{\mathcal{L}}(\bar{\mathbf{X}}_T) &\leq \frac{1}{T} \sum_{t=1}^T \text{tr}[\mathbf{V}(\mathbf{X}_t)^\dagger (\mathbf{X}^* - \mathbf{X}_t)] \\ &\leq \frac{1}{T} \sum_{t=1}^T F_t \left( \frac{1}{\gamma_t} - \frac{1}{\gamma_{t-1}} \right) + \frac{1}{2T} \sum_{t=1}^T \gamma_t \|\hat{\mathbf{V}}_t\|_F^2 \\ &\quad + \frac{4}{T} \sum_{t=1}^T \|b_t\|_F + \frac{1}{T} \sum_{t=1}^T \text{tr}[U_t^\dagger (\mathbf{X}_t - \mathbf{X}^*)] \end{aligned} \quad (\text{C.44})$$

Now, we have:

$$\mathbb{E}[\text{tr}[U_t^\dagger (\mathbf{X}_t - \mathbf{X}^*)]] = \mathbb{E}[\mathbb{E}[\text{tr}[U_t^\dagger (\mathbf{X}_t - \mathbf{X}^*)] | \mathcal{F}_t]] = 0 \quad (\text{C.45})$$

since  $\mathbf{X}_t$  is  $\mathcal{F}_t$ -measurable and  $\mathbb{E}[U_t | \mathcal{F}_t] = 0$ .

Moreover, by [Proposition 4](#), we have:

$$\|b_{i,t}\|_F = \|\mathbb{E}[\hat{\mathbf{V}}_{i,t} | \mathcal{F}_t] - \mathbf{V}_i(\mathbf{X}_t)\|_F \leq 2D_i L \delta_t \quad (\text{C.46})$$

and

$$\mathbb{E}[\|\hat{\mathbf{V}}_{i,t}\|_F^2] = \mathbb{E}[\mathbb{E}[\|\hat{\mathbf{V}}_{i,t}\|_F^2 | \mathcal{F}_t]] \leq \frac{D_i^2 B^2}{\delta_t^2} \quad (\text{C.47})$$

Hence, taking expectation in [\(D.34\)](#), we obtain:

$$\begin{aligned} \mathbb{E}[\text{Gap}_{\mathcal{L}}(\bar{\mathbf{X}}_T)] &\leq \frac{1}{T} \sum_{t=1}^T \mathbb{E}[F_t] \left( \frac{1}{\gamma_t} - \frac{1}{\gamma_{t-1}} \right) + \frac{1}{2T} \sum_{t=1}^T \gamma_t \mathbb{E}[\|\hat{\mathbf{V}}_t\|_F^2] + \frac{4}{T} \sum_{t=1}^T \mathbb{E}[\|b_t\|_F] \\ &\leq \frac{1}{T} \sum_{t=1}^T \mathbb{E}[F_t] \left( \frac{1}{\gamma_t} - \frac{1}{\gamma_{t-1}} \right) + \frac{2D^2 B^2}{T} \sum_{t=1}^T \frac{\gamma_t}{\delta_t^2} + \frac{16DL}{T} \sum_{t=1}^T \delta_t \end{aligned} \quad (\text{C.48})$$

Setting  $\gamma_t = \gamma$  and  $\delta_t = \delta$ , we obtain:

$$\mathbb{E}[\text{Gap}_{\mathcal{L}}(\bar{\mathbf{X}}_T)] \leq \frac{\mathbb{E}[F_1]}{\gamma T} + \frac{2D^2 B^2 \gamma}{\delta^2} + 16DL\delta \quad (\text{C.49})$$

and finally, noting that

$$\mathbb{E}[F_1] = D(\mathbf{X}^*, \mathbf{X}_1) \leq \log(d_1 d_2) \quad (\text{C.50})$$

we get:

$$\mathbb{E}[\text{Gap}_{\mathcal{L}}(\bar{\mathbf{X}}_T)] \leq \frac{H}{\gamma T} + \frac{2D^2 B^2 \gamma}{\delta^2} + 16DL\delta \quad (\text{C.51})$$

where  $H = \log(d_1 d_2)$ . Hence, after tuning  $\gamma$  and  $\delta$  to optimize this last expression, our result follows by setting  $\gamma = \left(\frac{H}{2T}\right)^{3/4} \frac{1}{2D\sqrt{BL}}$  and  $\delta = \left(\frac{H}{2T}\right)^{1/4} \sqrt{\frac{B}{4L}}$ . ■

## D Omitted proofs from [Section 6](#)

We provide first the bounds of the estimator [\(1PE\)](#) in a  $N$ -player quantum game. Formally, we have:

**Lemma D.1.** *The estimator [\(1PE\)](#) in a  $N$ -player quantum game  $\mathcal{Q}$  enjoys the conditional bounds*

$$(i) \quad \|\mathbb{E}[\hat{\mathbf{V}}_t | \mathcal{F}_t] - \mathbf{V}(\mathbf{X}_t)\|_F \leq \frac{1}{2} D L N^{3/2} \delta_t \quad \text{and} \quad (ii) \quad \mathbb{E}[\|\hat{\mathbf{V}}_t\|_F^2 | \mathcal{F}_t] \leq \frac{D^2 B^2 N}{\delta_t^2}. \quad (\text{D.1})$$

*Proof.* We prove each part separately.

(i) Let  $\Xi_{i,t}$  be defined for all players  $i \in \mathcal{N}$ :

$$\Xi_{i,t} = \mathbf{X}_{i,t}^{(\delta)} - \mathbf{X}_{i,t} = \delta_t \mathbf{Z}_{i,t} + \frac{\delta_t}{r_i} (\mathbf{R}_i - \mathbf{X}_{i,t}) = \delta_t \left[ \mathbf{Z}_{i,t} + \frac{1}{r_i} (\mathbf{R}_i - \mathbf{X}_{i,t}) \right] \quad (\text{D.2})$$

Taking a 1st-order Taylor expansion of  $u_i$ , we obtain:

$$u_i(\mathbf{X}_t^{(\delta)} + \delta_t \mathbf{Z}_t) = u_i(\mathbf{X}_t) + \sum_{j \in \mathcal{N}} \text{tr} \left[ \nabla_{\mathbf{X}_j^\top} u_i(\mathbf{X}_t)^\dagger \Xi_{j,t} \right] + R_2(\Xi_t) \quad (\text{D.3})$$

Since  $\mathbb{E}[U_i(\omega_t) | \mathcal{F}_t, \mathbf{Z}_t] = u(\mathbf{X}_t^{(\delta)} + \delta_t \mathbf{Z}_t)$ , combining it with [\(D.3\)](#), we readily get:

$$\begin{aligned} \mathbb{E}[\hat{\mathbf{V}}_{i,t} | \mathcal{F}_t, \mathbf{Z}_t] &= \frac{D_i}{\delta_t} u_i(\mathbf{X}_t^{(\delta)} + \delta_t \mathbf{Z}_t) \mathbf{Z}_{i,t} \\ &= \frac{D_i}{\delta_t} u_i(\mathbf{X}_t) \mathbf{Z}_{i,t} + \frac{D_i}{\delta_t} \sum_{j \in \mathcal{N}} \text{tr} \left[ \nabla_{\mathbf{X}_j^\top} u_i(\mathbf{X}_t)^\dagger \Xi_{j,t} \right] \mathbf{Z}_{i,t} + \frac{D_i}{\delta_t} R_2(\Xi_t) \mathbf{Z}_{i,t} \end{aligned} \quad (\text{D.4})$$



704 Now, because  $\mathbb{E}[\mathbf{Z}_{i,t} | \mathcal{F}_t] = 0$  and  $\mathbf{Z}_{i,t}$  is sampled independent of any other process, we have:

$$\mathbb{E}[u_i(\mathbf{X}_t)\mathbf{Z}_{i,t} | \mathcal{F}_t] = u_i(\mathbf{X}_t) \mathbb{E}[\mathbf{Z}_{i,t} | \mathcal{F}_t] = 0 \quad (\text{D.5})$$

705 and for  $j \neq i \in \mathcal{N}$ :

$$\mathbb{E}\left[\text{tr}\left[\nabla_{\mathbf{X}_j^\top} u_i(\mathbf{X}_t)^\dagger \Xi_{j,t}\right] \mathbf{Z}_{i,t} \mid \mathcal{F}_t\right] = 0 \quad (\text{D.6})$$

706 Therefore, we obtain:

$$\begin{aligned} \mathbb{E}\left[\sum_{j \in \mathcal{N}} \text{tr}\left[\nabla_{\mathbf{X}_j^\top} u_i(\mathbf{X}_t)^\dagger \Xi_{j,t}\right] \mathbf{Z}_{i,t} \mid \mathcal{F}_t\right] &= \mathbb{E}\left[\text{tr}\left[\mathbf{V}_i(\mathbf{X}_t)^\dagger \Xi_{i,t}\right] \mathbf{Z}_{i,t} \mid \mathcal{F}_t\right] \\ &= \delta_t \mathbb{E}\left[\text{tr}\left[\mathbf{V}_i(\mathbf{X}_t)^\dagger \mathbf{Z}_{i,t}\right] \mathbf{Z}_{i,t} \mid \mathcal{F}_t\right] \\ &= \frac{\delta_t}{D_i} \sum_{W \in \mathcal{E}_i} \text{tr}\left[\mathbf{V}_i(\mathbf{X}_t)^\dagger W\right] W \\ &= \frac{\delta_t}{D_i} \text{proj}_{\mathcal{E}_i}(\mathbf{V}_i(\mathbf{X}_t)) = \frac{\delta_t}{D_i} \mathbf{V}_i(\mathbf{X}_t) \end{aligned} \quad (\text{D.7})$$

707 where in the last step, we identify  $\text{proj}_{\mathcal{E}_i}(\mathbf{V}_i(\mathbf{X}_t))$  with  $\mathbf{V}_i(\mathbf{X}_t)$ , as explained in the proof of  
708 [Proposition 3](#). Moreover, we have that

$$|R_2(\Xi_t)| \leq \frac{L}{2} \|\Xi_t\|_F^2 \leq \frac{1}{2} L N \delta_t^2 \quad (\text{D.8})$$

709 In view of the above, we have:

$$\|\mathbb{E}[\hat{\mathbf{V}}_{i,t} | \mathcal{F}_t] - \mathbf{V}_i(\mathbf{X}_t)\|_F \leq \frac{1}{2} D_i L N \delta_t \quad (\text{D.9})$$

710 and, therefore,

$$\|\mathbb{E}[\hat{\mathbf{V}}_t | \mathcal{F}_t] - \mathbf{V}(\mathbf{X}_t)\|_F \leq \frac{1}{2} D L N^{3/2} \delta_t \quad (\text{D.10})$$

711 (ii) By the definition of  $\hat{\mathbf{V}}_{i,t}$ , we have:

$$\|\hat{\mathbf{V}}_{i,t}\|_F = \frac{D_i}{\delta_t} \left| u_i(\mathbf{X}_t^{(\delta)} + \delta_t \mathbf{Z}_t) \right| \|\mathbf{Z}_{i,t}\|_F \leq \frac{D_i B}{\delta_t} \quad (\text{D.11})$$

712 and therefore, we readily obtain that:

$$\mathbb{E}[\|\hat{\mathbf{V}}_{i,t}\|_F^2 | \mathcal{F}_t] \leq \frac{D_i^2 B^2}{\delta_t^2} \quad (\text{D.12})$$

713 Hence, ultimately, we get the bound

$$\mathbb{E}[\|\hat{\mathbf{V}}_t\|_F^2 | \mathcal{F}_t] \leq \frac{D^2 B^2 N}{\delta_t^2} \quad (\text{D.13})$$

714 and our proof is complete. ■

715 With all this in hand, we are finally in a position to proceed with the proof of [Theorem 4](#), which we  
716 restate below for convenience:

717 **Theorem 4.** Fix some tolerance level  $\eta \in (0, 1)$  and suppose that the players of an  $N$ -player quantum  
718 game follow (3MW) with bandit, realization-based feedback, and surrogate gradients provided by  
719 the estimator (1PE) with step-size and sampling radius parameters such that

$$(i) \sum_{t=1}^{\infty} \gamma_t = \infty, \quad (ii) \sum_{t=1}^{\infty} \gamma_t \delta_t < \infty, \quad \text{and} \quad (iii) \sum_{t=1}^{\infty} \gamma_t^2 / \delta_t^2 < \infty. \quad (\text{22})$$

720 If  $\mathbf{X}^*$  is variationally stable, there exists a neighborhood  $\mathcal{U}$  of  $\mathbf{X}^*$  such that

$$\mathbb{P}(\lim_{t \rightarrow \infty} \mathbf{X}_t = \mathbf{X}^*) \geq 1 - \eta \quad \text{whenever } \mathbf{X}_1 \in \mathcal{U}. \quad (\text{23})$$

721 *Proof.* Since  $\mathbf{X}^*$  is variationally stable, there exists a neighborhood  $\mathcal{U}_{\text{vs}}$  of it such that

$$\text{tr}[\mathbf{V}(\mathbf{X})(\mathbf{X} - \mathbf{X}^*)] < 0 \quad \text{for all } \mathbf{X} \in \mathcal{U}_{\text{vs}} \setminus \{\mathbf{X}^*\}. \quad (\text{D.14})$$

722 For any  $\varepsilon' > 0$ , defining

$$\mathcal{U}'_{\varepsilon} := \{\mathbf{X} \in \mathcal{X} : D(\mathbf{X}^*, \mathbf{X}) < \varepsilon'\} \quad (\text{D.15})$$

723 we readily obtain by the continuity of  $\mathbf{X} \mapsto D(\mathbf{X}^*, \mathbf{X})$  at  $\mathbf{X}^*$  that there exists a neighborhood  $\mathcal{U}_{\varepsilon}$  of  
724  $\mathbf{X}^*$  such that  $\mathcal{U}_{\varepsilon} \subseteq \mathcal{U}_{\text{vs}}$ . Note that if  $\varepsilon_1 < \varepsilon_2$ , we automatically get that  $\mathcal{U}_{\varepsilon_1} \subseteq \mathcal{U}_{\varepsilon_2}$ .

725 In view of this, we let  $\mathbf{X}_1 \in \mathcal{U}_{\varepsilon/4} \subseteq \mathcal{U}_{\varepsilon} \subseteq \mathcal{U}_{\text{vs}}$ . We divide the rest of the proof in steps.

726 **Step 1. Deriving the general energy inequality**

727 By Lemma 1 we have that:

$$D(\mathbf{X}^*, \mathbf{X}_{t+1}) \leq D(\mathbf{X}^*, \mathbf{X}_t) + \gamma_t \text{tr}[\hat{\mathbf{V}}_t(\mathbf{X}_t - \mathbf{X}^*)] + \frac{\gamma_t^2}{2} \|\hat{\mathbf{V}}_t\|_F^2. \quad (\text{D.16})$$

728 Decomposing  $\hat{\mathbf{V}}_t$  into

$$\hat{\mathbf{V}}_t = \mathbf{V}(\mathbf{X}_t) + b_t + U_t \quad (\text{D.17})$$

729 as per (C.20) and applying (D.16) inequality iteratively, we get that

$$\begin{aligned} D(\mathbf{X}^*, \mathbf{X}_{t+1}) &\leq D(\mathbf{X}^*, \mathbf{X}_1) + \sum_{s=1}^t \gamma_s \text{tr}[\hat{\mathbf{V}}_s(\mathbf{X}_s - \mathbf{X}^*)] + \frac{1}{2} \sum_{s=1}^t \gamma_s^2 \|\hat{\mathbf{V}}_s\|_F^2 \\ &\leq D(\mathbf{X}^*, \mathbf{X}_1) + \sum_{s=1}^t \gamma_s \text{tr}[\mathbf{V}(\mathbf{X}_s)(\mathbf{X}_s - \mathbf{X}^*)] + \sum_{s=1}^t \gamma_s \text{tr}[b_s(\mathbf{X}_s - \mathbf{X}^*)] \\ &\quad + \sum_{s=1}^t \gamma_s \text{tr}[U_s(\mathbf{X}_s - \mathbf{X}^*)] + \frac{1}{2} \sum_{s=1}^t \gamma_s^2 \|\hat{\mathbf{V}}_s\|_F^2 \\ &\leq D(\mathbf{X}^*, \mathbf{X}_1) + \sum_{s=1}^t \gamma_s \text{tr}[\mathbf{V}(\mathbf{X}_s)(\mathbf{X}_s - \mathbf{X}^*)] + \sum_{s=1}^t \gamma_s \|b_s\|_F \|\mathbf{X}_s - \mathbf{X}^*\|_F \\ &\quad + \sum_{s=1}^t \gamma_s \text{tr}[U_s(\mathbf{X}_s - \mathbf{X}^*)] + \frac{1}{2} \sum_{s=1}^t \gamma_s^2 \|\hat{\mathbf{V}}_s\|_F^2 \\ &\leq D(\mathbf{X}^*, \mathbf{X}_1) + \sum_{s=1}^t \gamma_s \text{tr}[\mathbf{V}(\mathbf{X}_s)(\mathbf{X}_s - \mathbf{X}^*)] + \text{diam}(\mathcal{X}) \sum_{s=1}^t \gamma_s \|b_s\|_F \\ &\quad + \sum_{s=1}^t \gamma_s \text{tr}[U_s(\mathbf{X}_s - \mathbf{X}^*)] + \frac{1}{2} \sum_{s=1}^t \gamma_s^2 \|\hat{\mathbf{V}}_s\|_F^2 \end{aligned} \quad (\text{D.18})$$

730 Defining the processes  $\Psi_t$ ,  $M_t$  and  $Z_t$  for  $t = 1, 2, \dots$  as

$$\Psi_t := \frac{1}{2} \sum_{s=1}^t \gamma_s^2 \|\hat{\mathbf{V}}_s\|_F^2 \quad (\text{D.19a})$$

$$M_t := \sum_{s=1}^t \gamma_s \text{tr}[U_s(\mathbf{X}_s - \mathbf{X}^*)] \quad (\text{D.19b})$$

$$Z_t := \text{diam}(\mathcal{X}) \sum_{s=1}^t \gamma_s \|b_s\|_F \quad (\text{D.19c})$$

731 equation (D.18) can be rewritten as

$$D(\mathbf{X}^*, \mathbf{X}_{t+1}) \leq D(\mathbf{X}^*, \mathbf{X}_1) + \sum_{s=1}^t \gamma_s \text{tr}[\mathbf{V}(\mathbf{X}_s)(\mathbf{X}_s - \mathbf{X}^*)] + Z_t + M_t + \Psi_t \quad (\text{D.20})$$

732 **Step 2. Bounding the noise terms**

733 Let  $\varepsilon > 0$  as defined in the beginning of the proof.

734  
735

- Regarding the term  $Z_t$ , it is clear that the process  $\{Z_t : t \geq 1\}$  is a sub-martingale. Hence, by Doob's maximal inequality for sub-martingales [20], we get that:

$$\begin{aligned}
\mathbb{P}\left(\sup_{s \leq t} Z_s \geq \varepsilon/4\right) &\leq \frac{\mathbb{E}[Z_t]}{\varepsilon/4} \\
&\leq \frac{\text{diam}(\mathcal{X}) \sum_{s=1}^t \gamma_s \mathbb{E}[\|b_s\|_F]}{\varepsilon/4} \\
&\leq \frac{\text{diam}(\mathcal{X}) \sum_{t=1}^\infty \gamma_t \mathbb{E}[\|b_t\|_F]}{\varepsilon/4} \\
&= \frac{\text{diam}(\mathcal{X}) \sum_{t=1}^\infty \gamma_t \mathbb{E}[\mathbb{E}[\|b_t\|_F | \mathcal{F}_t]]}{\varepsilon/4} \\
&\leq \frac{2 \text{diam}(\mathcal{X}) D L N^{3/2} \sum_{t=1}^\infty \gamma_t \delta_t}{\varepsilon} \tag{D.21}
\end{aligned}$$

736

By ensuring that

$$\sum_{t=1}^\infty \gamma_t \delta_t \leq \frac{\varepsilon \eta}{6 \text{diam}(\mathcal{X}) D L N^{3/2}} \tag{D.22}$$

737

and taking  $t$  go to  $\infty$ , (D.21) becomes:

$$\mathbb{P}\left(\sup_{t \geq 1} Z_t \geq \varepsilon/4\right) \leq \eta/3 \tag{D.23}$$

738  
739

- Similarly, it is clear that the process  $\{\Psi_t : t \geq 1\}$  is a sub-martingale. Following the same procedure, by Doob's maximal inequality for sub-martingales [20], we get that:

$$\begin{aligned}
\mathbb{P}\left(\sup_{s \leq t} \Psi_s \geq \varepsilon/4\right) &\leq \frac{\mathbb{E}[\Psi_t]}{\varepsilon/4} \leq \frac{\frac{1}{2} \sum_{s=1}^t \gamma_s^2 \mathbb{E}[\|\hat{\mathbf{V}}_s\|_F^2]}{\varepsilon/4} \\
&\leq \frac{\frac{1}{2} \sum_{t=1}^\infty \gamma_t^2 \mathbb{E}[\|\hat{\mathbf{V}}_t\|_F^2]}{\varepsilon/4} \\
&\leq \frac{2D^2 B^2 N \sum_{t=1}^\infty \gamma_t^2 / \delta_t^2}{\varepsilon} \tag{D.24}
\end{aligned}$$

740

By ensuring that

$$\sum_{t=1}^\infty \gamma_t^2 / \delta_t^2 \leq \frac{\varepsilon \eta}{6D^2 B^2 N} \tag{D.25}$$

741

and taking  $t \rightarrow \infty$ , (D.24) becomes:

$$\mathbb{P}\left(\sup_{t \geq 1} \Psi_t \geq \varepsilon/4\right) \leq \eta/3 \tag{D.26}$$

742  
743

- Finally, regarding the term  $M_t$ , the process  $\{M_t : t \geq 1\}$  is a martingale. Following the same procedure, by Doob's maximal inequality for martingales [20], we get that:

$$\begin{aligned}
\mathbb{P}\left(\sup_{s \leq t} M_s \geq \varepsilon/4\right) &\leq \mathbb{P}\left(\sup_{s \leq t} |M_s| \geq \varepsilon/4\right) \leq \frac{\mathbb{E}[M_t^2]}{(\varepsilon/4)^2} = \frac{\sum_{s=1}^t \gamma_s^2 \mathbb{E}[\text{tr}[U_s(\mathbf{X}_s - \mathbf{X}^*)]^2]}{(\varepsilon/4)^2} \\
&\leq \frac{\text{diam}(\mathcal{X})^2 \sum_{s=1}^t \gamma_s^2 \mathbb{E}[\|U_s\|_F^2]}{(\varepsilon/4)^2} \\
&\leq \frac{\text{diam}(\mathcal{X})^2 \sum_{t=1}^\infty \gamma_t^2 \mathbb{E}[\|U_t\|_F^2]}{(\varepsilon/4)^2} \\
&\leq \frac{4 \text{diam}(\mathcal{X})^2 \sum_{t=1}^\infty \gamma_t^2 \mathbb{E}[\|\hat{\mathbf{V}}_t\|_F^2]}{(\varepsilon/4)^2} \\
&\leq \frac{4 \text{diam}(\mathcal{X})^2 D^2 B^2 N \sum_{t=1}^\infty \gamma_t^2 / \delta_t^2}{(\varepsilon/4)^2} \tag{D.27}
\end{aligned}$$

744 where we used the fact that

$$\begin{aligned}\mathbb{E}[M_t^2] &= \mathbb{E}\left[\sum_{s=1}^t \gamma_s^2 \text{tr}[U_s(\mathbf{X}_s - \mathbf{X}^*)]^2 + \sum_{k < \ell} \gamma_k \gamma_\ell \text{tr}[U_k(\mathbf{X}_k - \mathbf{X}^*)] \text{tr}[U_\ell(\mathbf{X}_\ell - \mathbf{X}^*)]\right] \\ &= \mathbb{E}\left[\sum_{s=1}^t \gamma_s^2 \text{tr}[U_s(\mathbf{X}_s - \mathbf{X}^*)]^2\right]\end{aligned}\quad (\text{D.28})$$

745 itself following from the total expectation

$$\begin{aligned}\mathbb{E}[\text{tr}[U_k(\mathbf{X}_k - \mathbf{X}^*)] \text{tr}[U_\ell(\mathbf{X}_\ell - \mathbf{X}^*)]] &= \mathbb{E}[\mathbb{E}[\text{tr}[U_k(\mathbf{X}_k - \mathbf{X}^*)] \text{tr}[U_\ell(\mathbf{X}_\ell - \mathbf{X}^*)] \mid \mathcal{F}_\ell]] \\ &= \mathbb{E}[\text{tr}[U_k(\mathbf{X}_k - \mathbf{X}^*)] \mathbb{E}[\text{tr}[U_\ell(\mathbf{X}_\ell - \mathbf{X}^*)] \mid \mathcal{F}_\ell]] \\ &= 0\end{aligned}\quad (\text{D.29})$$

746 Now, by ensuring that

$$\sum_{t=1}^{\infty} \gamma_t^2 / \delta_t^2 \leq \frac{(\varepsilon/4)^2 \eta}{12 \text{diam}(\mathcal{X})^2 D^2 B^2 N} \quad (\text{D.30})$$

747 and taking  $t$  go to  $\infty$ , (D.27) becomes:

$$\mathbb{P}\left(\sup_{t \geq 1} M_t \geq \varepsilon/4\right) \leq \eta/3 \quad (\text{D.31})$$

748 Therefore, combining (D.23), (D.26) and (D.31) and applying a union bound, we get:

$$\mathbb{P}\left(\left\{\sup_{t \geq 1} Z_t \geq \varepsilon/4\right\} \cup \left\{\sup_{t \geq 1} \Psi_t \geq \varepsilon/4\right\} \cup \left\{\sup_{t \geq 1} M_t \geq \varepsilon/4\right\}\right) \leq \eta \quad (\text{D.32})$$

749 Thus, defining the event  $E := \{\sup_{t \geq 1} Z_t + \Psi_t + M_t < \frac{3}{4}\varepsilon\}$ , Eq. (D.32) readily implies that:

$$\mathbb{P}(E) \geq 1 - \eta \quad (\text{D.33})$$

### 750 Step 3. $\mathbf{X}_t \in \mathcal{U}_{\text{vs}}$ with high probability

751 Since  $\mathbf{X}_1 \in \mathcal{U}_{\varepsilon/4} \subseteq \mathcal{U}_{\text{vs}}$ , by induction on  $t$  we have that under the event  $E$

$$D(\mathbf{X}^*, \mathbf{X}_{t+1}) \leq D(\mathbf{X}^*, \mathbf{X}_1) + \sum_{s=1}^t \gamma_s \text{tr}[\mathbf{V}(\mathbf{X}_s)(\mathbf{X}_s - \mathbf{X}^*)] + Z_t + M_t + \Psi_t \quad (\text{D.34})$$

$$\leq \frac{\varepsilon}{4} + \frac{\varepsilon}{4} + \frac{\varepsilon}{4} + \frac{\varepsilon}{4} = \varepsilon \quad (\text{D.35})$$

752 where in the last step we used the inductive hypothesis that  $\mathbf{X}_s \in \mathcal{U}_{\text{vs}}$  for all  $s = 1, \dots, t$ ,  
753 which implies  $\text{tr}[\mathbf{V}(\mathbf{X}_s)(\mathbf{X}_s - \mathbf{X}^*)] < 0$ . This implies that  $\mathbf{X}_{t+1} \in \mathcal{U}_{\varepsilon} \subseteq \mathcal{U}_{\text{vs}}$ .

754 Therefore, we obtain that  $\mathbf{X}_{t+1} \in \mathcal{U}_{\varepsilon} \subseteq \mathcal{U}_{\text{vs}}$  for all  $t \geq 1$ . For the rest of the proof we will  
755 work under the event  $E$ .

### 756 Step 4. Subsequential convergence

757 Now we will show that there exists a subsequence  $\{\mathbf{X}_{t_k} : k \geq 1\}$  such that  $\lim_{k \rightarrow \infty} \mathbf{X}_{t_k} = \mathbf{X}^*$ .  
758 Suppose it does not. Then, this would mean that the quantity  $\text{tr}[\mathbf{V}(\mathbf{X}_t)(\mathbf{X}_t - \mathbf{X}^*)]$  is bounded  
759 away from zero. Combining it with the fact that  $\mathbf{X}_t \in \mathcal{U}_{\text{vs}}$  for all  $t \geq 0$ , we readily get that  
760 there exists  $c > 0$  such that:

$$\text{tr}[\mathbf{V}(\mathbf{X}_s)(\mathbf{X}_s - \mathbf{X}^*)] < -c \quad (\text{D.36})$$

761 Then, (D.20) would give:

$$D(\mathbf{X}^*, \mathbf{X}_{t+1}) \leq \varepsilon - c \sum_{s=1}^t \gamma_s \quad (\text{D.37})$$

762 Hence, taking  $t \rightarrow \infty$ , and using that  $\sum_{t \geq 1} \gamma_t = \infty$ , we would get that  $D(\mathbf{X}^*, \mathbf{X}_t) \rightarrow -\infty$ ,  
763 which is a contradiction, since  $D(\mathbf{X}^*, \mathbf{X}_t) \geq 0$ .

764 Hence, there exists a subsequence  $\{\mathbf{X}_{t_k} : k \geq 1\}$  such that  $\lim_{k \rightarrow \infty} \mathbf{X}_{t_k} = \mathbf{X}^*$ , i.e.,

$$\lim_{k \rightarrow \infty} D(\mathbf{X}^*, \mathbf{X}_{t_k}) = 0. \quad (\text{D.38})$$

765 **Step 5. Existence of  $\lim_{t \rightarrow \infty} D(\mathbf{X}^*, \mathbf{X}_t)$**

766 We define the sequence of events  $\{E_t : t \geq 1\}$  as

$$E_t := \left\{ \sup_{s \leq t-1} Z_s + \Psi_s + M_s < \frac{3}{4}\varepsilon \right\} \quad \text{for } t \geq 2 \quad (\text{D.39})$$

767 and

$$E_1 := \{\mathbf{X}_1 \in \mathcal{U}_{\varepsilon/4}\} \quad (\text{D.40})$$

768 Then we have that  $E_t \in \mathcal{F}_t$  and  $E_t \subseteq \{\mathbf{X}_s \in \mathcal{U}_{\text{vs}} : s = 1, \dots, t\}$ .

769 Defining the random process  $\{\tilde{D}_t : t \geq 1\}$  as

$$\tilde{D}_t = D(\mathbf{X}^*, \mathbf{X}_t) \mathbb{1}_{E_t} \quad (\text{D.41})$$

770 Then, by (D.16) we have

$$\begin{aligned} D(\mathbf{X}^*, \mathbf{X}_{t+1}) &\leq D(\mathbf{X}^*, \mathbf{X}_t) + \gamma_t \text{tr}[\mathbf{V}(\mathbf{X}_t)(\mathbf{X}_t - \mathbf{X}^*)] + \text{diam}(\mathcal{X})\gamma_t \|b_t\|_F \\ &\quad + \gamma_t \text{tr}[U_t(\mathbf{X}_t - \mathbf{X}^*)] + \frac{1}{2}\gamma_t^2 \|\hat{\mathbf{V}}_t\|_F^2 \end{aligned} \quad (\text{D.42})$$

771 Multiplying the above relation with  $\mathbb{1}_{E_t}$ , and noting that  $\mathbb{1}_{E_{t+1}} \leq \mathbb{1}_{E_t}$ , since  $E_{t+1} \subseteq E_t$ , we  
772 have

$$\begin{aligned} \tilde{D}_{t+1} &\leq \tilde{D}_t + \gamma_t \text{tr}[\mathbf{V}(\mathbf{X}_t)(\mathbf{X}_t - \mathbf{X}^*)] \mathbb{1}_{E_t} + \text{diam}(\mathcal{X})\gamma_t \|b_t\|_F \mathbb{1}_{E_t} \\ &\quad + \gamma_t \text{tr}[U_t(\mathbf{X}_t - \mathbf{X}^*)] \mathbb{1}_{E_t} + \frac{1}{2}\gamma_t^2 \|\hat{\mathbf{V}}_t\|_F^2 \mathbb{1}_{E_t} \end{aligned} \quad (\text{D.43})$$

$$\leq \tilde{D}_t + \text{diam}(\mathcal{X})\gamma_t \|b_t\|_F \mathbb{1}_{E_t} + \gamma_t \text{tr}[U_t(\mathbf{X}_t - \mathbf{X}^*)] \mathbb{1}_{E_t} + \frac{1}{2}\gamma_t^2 \|\hat{\mathbf{V}}_t\|_F^2 \mathbb{1}_{E_t} \quad (\text{D.44})$$

773 where in the last step we used that  $\text{tr}[\mathbf{V}(\mathbf{X}_t)(\mathbf{X}_t - \mathbf{X}^*)] \mathbb{1}_{E_t} \leq 0$ . Therefore, we obtain that:

$$\mathbb{E}[\tilde{D}_{t+1} | \mathcal{F}_t] \leq \tilde{D}_t + \text{diam}(\mathcal{X})\gamma_t \mathbb{1}_{E_t} \mathbb{E}[\|b_t\|_F | \mathcal{F}_t] + \frac{1}{2}\gamma_t^2 \mathbb{1}_{E_t} \mathbb{E}[\|\hat{\mathbf{V}}_t\|_F^2 | \mathcal{F}_t] \quad (\text{D.45})$$

774 where we used that

$$\mathbb{E}[\text{tr}[\mathbf{V}(\mathbf{X}_t)(\mathbf{X}_t - \mathbf{X}^*)] \mathbb{1}_{E_t} | \mathcal{F}_t] = \mathbb{1}_{E_t} \mathbb{E}[\text{tr}[\mathbf{V}(\mathbf{X}_t)(\mathbf{X}_t - \mathbf{X}^*)] | \mathcal{F}_t] = 0 \quad (\text{D.46})$$

775 Therefore,  $\{\tilde{D}_t : t \geq 1\}$  is an almost super-martingale [40] and, thus, there exists  $\tilde{D}_\infty$  with  
776  $\tilde{D}_\infty$  finite (a.s.) and  $\tilde{D}_t \rightarrow \tilde{D}_\infty$  (a.s.).

777 Since  $E = \cap_{t \geq 1} E_t$ , we have:

$$\mathbb{P}\left(\lim_{t \rightarrow \infty} D(\mathbf{X}^*, \mathbf{X}_t) \text{ exists} \mid E\right) = \frac{\mathbb{P}(\{\lim_{t \rightarrow \infty} D(\mathbf{X}^*, \mathbf{X}_t) \text{ exists}\} \cap E)}{\mathbb{P}(E)} \quad (\text{D.47})$$

$$= \frac{\mathbb{P}(\{\lim_{t \rightarrow \infty} \tilde{D}_t \text{ exists}\} \cap E)}{\mathbb{P}(E)} = 1 \quad (\text{D.48})$$

778 Hence,  $\lim_{t \rightarrow \infty} \tilde{D}_t$  exists on  $E$  and by Step 3 we readily get that  $\lim_{t \rightarrow \infty} \tilde{D}_t = 0$  on  $E$ . Thus,  
779 by Lemma A.2, we get

$$\lim_{t \rightarrow \infty} \mathbf{X}_t = \mathbf{X}^* \quad \text{on the event } E \quad (\text{D.49})$$

780 and setting  $\mathcal{U} = \mathcal{U}_{\varepsilon/4}$ , we obtain

$$\mathbb{P}\left(\lim_{t \rightarrow \infty} \mathbf{X}_t = \mathbf{X}^*\right) \geq 1 - \eta \quad \text{whenever } \mathbf{X}_1 \in \mathcal{U}. \quad (\text{D.50})$$

781 This concludes our discussion and our proof. ■

## 782 E Numerical experiments

783 In this last appendix, we provide a series of numerical simulations to validate and explore the  
784 performance of (MMW) with payoff-based feedback.



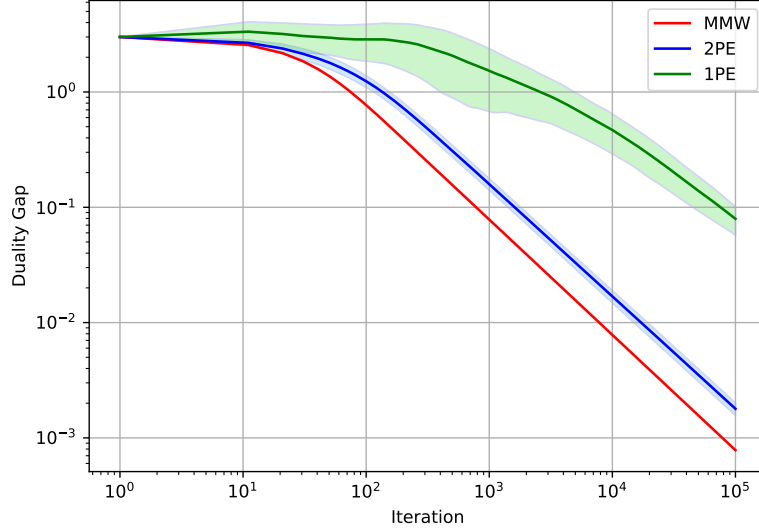

**Figure 1:** Performance evaluation of the (3MW) with the (2PE) and (1PE) estimators and comparison with the full information (MMW). The solid lines correspond to the mean values of the duality gap of each method, and the shaded regions enclose the area of  $\pm 1$  (sample) standard deviation among the 10 different runs.

**Game setup.** Our testbed is a two-player zero-sum quantum game, which is the quantum analogue of a  $2 \times 2$  min-max game with actions  $\{\alpha_1, \alpha_2\}$  and  $\{\beta_1, \beta_2\}$ , and payoff matrix

$$P = \begin{pmatrix} (4, -4) & (2, -2) \\ (-4, 4) & (-2, 2) \end{pmatrix} \quad (\text{E.1})$$

In the quantum regime, the payoff information of the quantum game is encoded in the Hermitian matrices  $\mathbf{W}_1 = \text{diag}(4, 2, -4, -2)$ , and  $\mathbf{W}_2 = -\mathbf{W}_1$  as per Eq. (3) in Section 2. By elementary considerations, the action profile  $(\alpha_1, \beta_2)$  is a strict Nash equilibrium of the classical zero-sum game, which corresponds to the pure quantum state with density matrix profile  $\mathbf{X}^* = (\mathbf{X}_1^*, \mathbf{X}_2^*)$  where

$$\mathbf{X}_1^* = \begin{pmatrix} 1 & 0 \\ 0 & 0 \end{pmatrix} \quad \text{and} \quad \mathbf{X}_2^* = \begin{pmatrix} 0 & 0 \\ 0 & 1 \end{pmatrix} \quad (\text{E.2})$$

in the standard basis in which  $\mathbf{W}_1$  and  $\mathbf{W}_2$  are diagonal.

**Convergence speed analysis.** In Fig. 1, we evaluate the convergence properties of (3MW) using the estimators (2PE) and (1PE), and compare it with the full information variant (MMW). For each method, we perform 10 different runs, with  $T = 10^5$  steps each, and compute the mean value of the duality gap as a function of the iteration  $t = 1, 2, \dots, T$ . The solid lines correspond to the mean values of the duality gap of each method, and the shaded regions enclose the area of  $\pm 1$  (sample) standard deviation among the 10 different runs. Note that the red line, which corresponds to the full information (MMW), does not have a shaded region, since there is no randomness in the algorithm. All the runs for the three different methods were initialized for  $\mathbf{Y} = 0$  and we used  $\gamma = 10^{-2}$  for all methods. In particular, for (3MW) with gradient estimates given by (2PE) estimator, we used a sampling radius  $\delta = 10^{-2}$ , and for (3MW) with (1PE) estimator, we used  $\delta = 10^{-1}$  (in tune with our theoretical results which suggest the use of a tighter sampling radius when mixed payoff information is available to the players).

Figure 1 has several important take-aways. First and foremost, as is to be expected, the payoff-based methods lag behind the full-information variant of (MMW); however, what is particularly surprising is that the drop in performance is singularly mild. The 2-point variant of (3MW) only lags behind (MMW) by a factor of approximately 15%, while the 1-point, stochastic bandit variant of (3MW), despite lagging behind by more, still achieves essentially the same convergence speed (compare the slopes in Fig. 1). This is the second important take-away from our numerical experiments. In all our runs, the various algorithms achieved a rate of convergence closer to  $\mathcal{O}(1/T)$ , which is significantly faster than  $\mathcal{O}(1/\sqrt{T})$  and/or  $\mathcal{O}(1/T^{1/4})$ . This suggests that, in practice, the bandit variants of (MMW) may yield excellent performance benefits, despite the high degree of uncertainty incurred by the complete lack of information on the game being played.

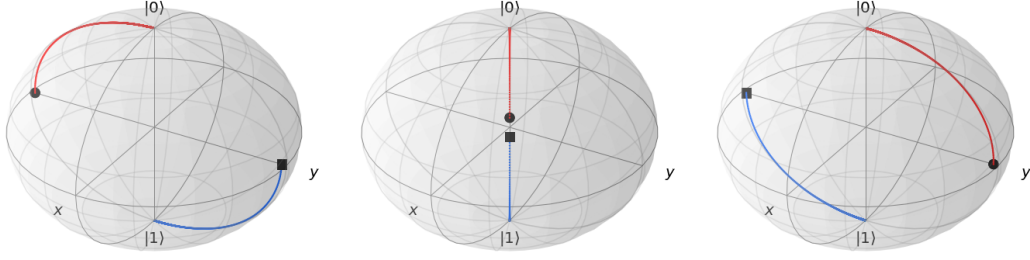

(a) Full information (MMW).

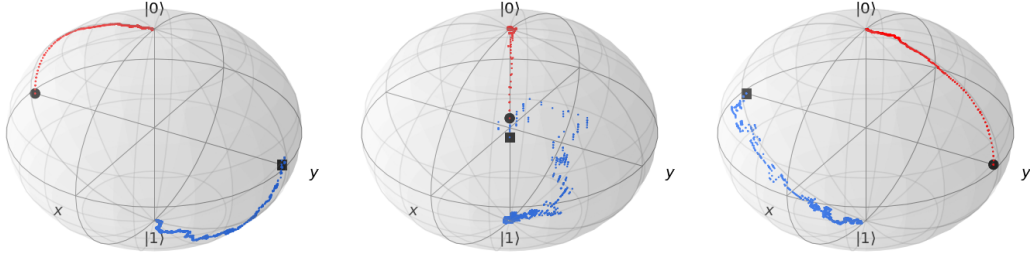

(b) (3MW) with the (2PE) estimator

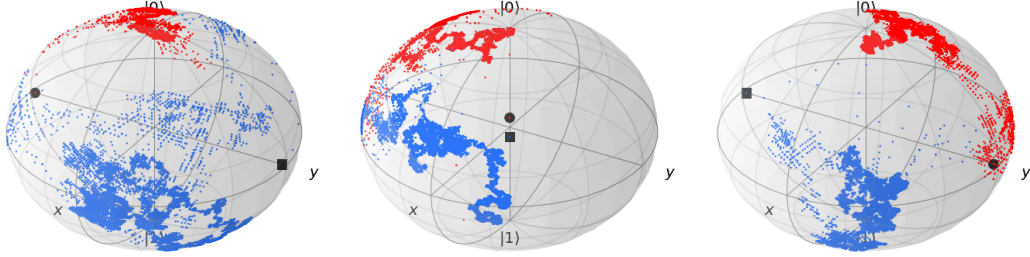

(c) (3MW) with the (1PE) estimator

**Figure 2:** Trajectories of the three methods for different initial conditions. The red points correspond to player 1, and the blue points to player 2. The initial points of the red trajectories are marked with  $\bullet$ , while the initial points of the blue ones are marked with  $\blacksquare$ .

**Trajectory analysis.** Finally, in Fig. 2, we provide a visualization of the actual trajectories of play generated by the three methods with the same parameters as before, for different initial conditions. The trajectories are presented in Bloch spheres [38], where the points  $|0\rangle$  and  $|1\rangle$  in the figure correspond to the density matrices

$$|0\rangle = \begin{pmatrix} 1 & 0 \\ 0 & 0 \end{pmatrix} \quad \text{and} \quad |1\rangle = \begin{pmatrix} 0 & 0 \\ 0 & 1 \end{pmatrix} \quad (\text{E.3})$$

respectively. In all figures, the points in red indicate the trajectory of Player 1, while the points in blue are for Player 2. The initial points of the red trajectories are marked with  $\bullet$ , while the initial points of the blue ones are marked with  $\blacksquare$ . [Each column of Bloch spheres in Fig. 2 has the same initial conditions.]

An important remark here is that, as suggested by Theorem 4, the trajectories of all methods converge – and quite rapidly at that – to the game’s (strict) Nash equilibrium. In fact, given that the trajectories converge to a pure state, this goes to explain the faster convergence rates observed in Fig. 1: instead

825 of oscillating around a solution, the MMW orbits actually *converge* to equilibrium in this case,  
826 so the trailing average converges at a much faster rate. This holds in all zero-sum games with a  
827 pure equilibrium, thus indicating a very important class of zero-sum games where the worst-case  
828 guarantees of MMW algorithms can be significantly improved.
